1 **Genetic glyco-profiling and rewiring of insulated flagellin glycosylation pathways**

2

3

4 Nicolas Kint<sup>1</sup>, Thomas Dubois<sup>2</sup> and Patrick H. Viollier<sup>1#</sup>

5

6

7 <sup>1</sup>Department of Microbiology & Molecular Medicine and Geneva Center for Inflammation Research  
8 (GCIR), Faculty of Medicine, University of Geneva, Rue Michel Servet 1, 1211 Genève 4,  
9 Switzerland.

10 <sup>2</sup>University of Lille, CNRS, INRAE, Centrale Lille, UMR 8207-UMET-Unité Matériaux et  
11 Transformations, F-59000 Lille, France.

12 #Corresponding author

13

14 **Summary**

15 Glycosylation of surface structures diversifies cells chemically and physically. Sialic acids commonly  
16 serve as glycosyl donors, particularly pseudaminic (Pse) or legionaminic acid (Leg) that prominently  
17 decorate eubacterial and archaeal surface layers or appendages. We investigated a new class of  
18 FlmG protein glycosyltransferases that modify flagellin, the structural subunit of the flagellar filament.  
19 Functional insulation of orthologous Pse and Leg biosynthesis pathways accounted for the flagellin  
20 glycosylation specificity and motility conferred by the cognate FlmG in the  $\alpha$ -proteobacteria  
21 *Caulobacter crescentus* and *Brevundimonas subvibrioides*, respectively. Exploiting these functions,  
22 we conducted genetic glyco-profiling to classify Pse or Leg biosynthesis pathways and we used  
23 heterologous reconstitution experiments to unearth a signature determinant of Leg biosynthesis in  
24 eubacteria and archaea. These findings and our chimeric FlmG analyses reveal two modular  
25 determinants that govern flagellin glycosyltransferase specificity: a glycosyltransferase domain that  
26 accepts either Leg or Pse and that uses specialized flagellin-binding domain to identify the substrate.

27

28

29

30

## 31 INTRODUCTION

32 Sialic acids, also known as nonulosonic acids (NuO), are nine-carbon ( $\alpha$ -keto) acidic sugars  
33 featuring acetamido linkages that are found in all domains of life [1]. The most prevalent vertebrate  
34 sialic acid, (5-)N-acetylneuraminic acid (Neu), occurs on surface glyco-conjugates like glycolipids or  
35 glycoproteins [2, 3]. While meningitis-causing eubacteria also camouflage their surface with Neu,  
36 most eubacteria and the archaea typically decorate their cell surface structures with (5-, 7-)di-  
37 acetamido derivatives, either pseudaminic acid (Pse) and/or its stereoisomer legionaminic acid (Leg,  
38 **Figure 1**). Pse or Leg are constituents of capsular polysaccharides (CPS or K-antigen)[4] or the O-  
39 antigen of lipopolysaccharide (LPS)[5], but they often also occur conjugated to proteinaceous surface  
40 appendages, for example on the subunits of S-layer arrays [6], pilus adhesins [7] or flagellar filaments  
41 (the H-antigen)[8, 9]. Pse and Leg derivatives synthesized *in vitro* can be added exogenously in  
42 metabolic labeling experiments to be incorporated into bacterial surface structures [10, 11]. Moreover,  
43 Pse and Leg are attractive vaccine targets as shown by the recent report that mice immunized with  
44 Pse chemically conjugated to a carrier protein were protected against the Pse-containing pathogenic  
45 *Acinetobacter baumannii* strain Ab-00.191 [12].

46 Pse- or Leg-decorated flagella may also be immunogenic. The flagellum consists of three  
47 major parts: an envelope-embedded basal body that houses the rotary engine and the secretion  
48 apparatus, a universal joint known as the hook that transmits torque from the motor and that  
49 protrudes to the cell surface, and finally a tubular flagellar propeller composed of flagellins that is  
50 mounted on the hook (**Figure 1**)[13, 14]. Once flagellin subunits are translated, they are exported  
51 through the flagellar protein secretory apparatus along the hollow flagellar filament for polymerization  
52 at its growing tip. Glycosylation typically occurs post-translationally on serine or threonine residues of  
53 flagellin by highly specific and flagellin glycosyltransferases (fGTs)[15, 16]. Unlike the pilus-specific  
54 glycosyltransferases that execute the glycosylation only after the acceptor protein has been  
55 translocated across the membrane [17, 18], the fGTs are soluble enzymes that act on flagellin in the  
56 cytoplasm before their secretion through the flagellar apparatus. Two types of fGTs have been  
57 described to date, the Maf- and FlmG-type [15]. It is thought that these fGTs accept CMP-activated  
58 forms of Pse or Leg as glycosyl donors and then join the Pse or Leg moiety to the flagellin acceptor  
59 molecule that they bind directly. Inactivation of the fGT or the corresponding Pse-/Leg-biosynthesis  
60 pathway results in failure to modify flagellin and (often) a motility defect [19]. It remains mysterious  
61 why these flagellin glycosylation mutants are non-motile and flagellin is often poorly secreted. Such  
62 mutants harbor a hook-basal-body (HBB), yet they lack a flagellar filament [19].

63 The synthesis of CMP-Pse or CMP-Leg proceeds enzymatically by series of steps [20-22],  
64 ultimately ending with the condensation of an activated 6-carbon monosaccharide (typically N-acetyl-  
65 glucosamine, GlcNAc) with 3-carbon pyruvate (such as phosphoenolpyruvate, PEP) by Pse or Leg  
66 synthase paralogs, PseI or LegI, respectively (**Figure 1**)[23, 24], whereas the sialic acid Neu is  
67 synthesized by the NeuB paralog [20-22, 25]. A major difference between the Pse and Leg pathways  
68 is that the former uses UDP-GlcNAc as starting material whereas the latter usually builds on GDP-  
69 GlcNAc [21, 22]. Pse or Leg must first be activated with CMP by the PseF or LegF enzyme,  
70 respectively (**Figure 1**) for used as glycosyl donors by terminal glycosyltransferases, including fGTs.

71 The structure-function relationship and specificities of Maf and FlmG fGTs is poorly  
72 understood. Some Maf enzymes have been linked to flagella glycosylated with Pse, while other Maf  
73 affect modification of flagella with Leg [10, 26-28]. The determinants conferring donor or acceptor  
74 specificities in these enzymes have not been elucidated. Recently, FlmG and Pse biosynthesis  
75 enzymes from the Gram-negative  $\alpha$ -proteobacterium *Caulobacter crescentus* were shown to be  
76 necessary and sufficient for modification of flagellin [19]. *C. crescentus* encodes six flagellin paralogs  
77 [29-31] that are no longer modified in the absence of Pse or FlmG [19]. Conversely, expression of  
78 FlmG and the FljK flagellin in heterologous hosts producing Pse resulted in FljK modification [19].  
79 Sequence analysis predicts a simple 2-domain organization for FlmG: an N-terminal tetratrico-  
80 peptide-repeat (TPR) domain and a C-terminal GT-B type glycosyltransferase domain [15]. Bacterial-  
81 two-hybrid (BACTH) assays revealed that the TPR domain can directly bind flagellin, whereas the GT-  
82 B domain cannot [19]. The donor specificity of the GT-B domain remains unexplored in the absence  
83 of a FlmG system that links Leg to flagellin.

84 Here we establish a glyco-profiling platform for functional analysis of Pse and Leg  
85 biosynthesis pathways using motility as a proxy and we exploit this set-up to uncover a novel FlmG  
86 glycosylation system in *Brevundimonas subvibrioides* that modifies flagellin with Leg. Using the *B.*  
87 *subvibrioides* and *C. crescentus* Leg and Pse biosynthesis mutants, we show that the two pathways  
88 are genetically insulated, defining a first level of specificity. We then reconstitute flagellin glycosylation  
89 using the *B. subvibrioides* components in *C. crescentus* and we reprogram a Pse-dependent FlmG  
90 into a Leg-dependent enzyme through domain substitutions in chimeras. Thus, two modular  
91 determinants govern specificity in fGTs, with the GT selecting either Leg or Pse as donor and linking it  
92 to the correct acceptor identified through a flagellin-binding domain.

93

## 94 RESULTS

95

### 96 Genetic glyco-profiling in *C. crescentus* $\Delta$ *psel* cells using motility as proxy.

97 Phylogenomic and functional analyses show that the genes encoding PEP-dependent  
98 synthases of sialic acids are wide-spread, present in all domains of life. The Psel and LegI synthases  
99 predominate in the eubacterial and archaeal lineages, sometimes co-encoded in the same genomes.  
100 As a rare example, *Campylobacter jejuni* 11168 has three (NeuB, Psel and LegI) synthases [22],  
101 while the *Pseudomonas sp.* Irchel 3E13 genome (NZ\_FYDX01000009.1)[32] encodes two predicted  
102 synthases, a Psel and LegI homolog, and *C. crescentus* only encodes only Psel (previously called  
103 NeuB)[19, 33]. Our previous heterologous complementation experiments of the motility defect  
104 associated with *C. crescentus*  $\Delta$ *psel* cells showed that of the three *C. jejuni* 11168 synthases, only  
105 Psel could support motility in *C. crescentus* [19]. These experiments provided strong support for the  
106 notion that the Pse synthesis pathway can only function properly with Psel, but not when it is  
107 substituted with LegI or NeuB. However, it is known that Pse and Leg often occur in derivatized  
108 (modified) forms [1, 3]. Such modifications could occur before the Psel synthase acts or afterwards. In  
109 the latter case, most (if not all) synthases would be predicted to produce the same Pse molecule,

110 which is then derivatized once it has been synthesized. If so, then the protein executing a particular  
111 enzymatic reaction should be replaceable by an orthologous enzyme executing the same reaction.

112 To investigate this idea on a comprehensive scale, we individually cloned 21 synthetic  
113 (codon-optimized) PseI or LegI coding sequences (CDSs) onto an expression plasmid for genetic  
114 glyco-profiling experiments using motility as proxy to report the ability of the candidates to substitute  
115 for the endogenous PseI of *C. crescentus* (Figure 2A and S1). In support of the notion that  
116 derivatization occurs after the PEP-dependent condensation reaction to form Pse or Leg, our glyco-  
117 profiling analysis revealed that putative PseI proteins (identified by sequence comparisons to *C. jejuni*  
118 11168, Table S1) conferred motility to *C. crescentus*  $\Delta$ pseI cells, whereas putative LegI synthases did  
119 not. This stringency for PseI synthase function using the *C. crescentus* motility readout was not only  
120 observed across species (e.g. *Shewanella oneidensis* vs. *Shewanella japonica*) or class (*Shewanella*  
121 *japonica* vs. *Magnetospirillum magneticum*), but also across the Gram-negative / Gram-positive divide  
122 (e.g. *Pseudomonas* sp. Irchel 3A5 vs. *Kurthia sibirica*) and, remarkably, across kingdoms (e.g.  
123 *Leptospira interrogans* vs *Methanobrevibacter smithii*, see Figure 2 and S1). Strikingly, in the case of  
124 certain *A. baumannii* strains, only one synthase least was able to confer motility to *C. crescentus*  
125  $\Delta$ pseI cells, suggesting that it is a PseI ortholog, while other two genomes might encode LegI-type  
126 synthases (see below).

127 Immunoblotting with antibodies to *C. crescentus* FljK [19] (FljK<sup>Cc</sup>, Figure 2B) revealed that all  
128 the PseI-type synthases that restored motility, also restored FljK modification. By contrast, the non-  
129 orthologous synthases neither supported motility, nor flagellin glycosylation. We conclude from our  
130 survey that (heterologous) PseI synthase activity generally confers motility to *C. crescentus*  $\Delta$ pseI  
131 cells, whereas LegI-type (or NeuB-type) synthases are unable to do so.

132

### 133 **Flagellin glycosylation in *Brevundimonas subvibrioides* is FlmG- and LegI-dependent.**

134 An unexpected glyco-profiling result was that the synthase orthologs encoded in the genomes  
135 of different *Brevundimonas* species, that are members of the same family (*Caulobacteraceae*) as *C.*  
136 *crescentus*, were unable to replace PseI (Figure 2). A closer look by sequence comparisons revealed  
137 that three *Brevundimonas* orthologs tested are in fact more similar to LegI from *C. jejuni* 11168 than  
138 to PseI. For example, the *B. subvibrioides* ortholog is 42% identical and 64% similar to *C. jejuni* 11168  
139 LegI and only 32% identical and 52% similar to PseI (Table S1). On this basis, we speculated that  
140 these *Brevundimonas* species likely synthesize Leg rather than Pse. In support of this idea, our  
141 bioinformatic searches using *C. jejuni* 11168 as reference genome identified all six putative enzymes  
142 in the *B. subvibrioides* ATCC15264 genome (CP002102.1) predicted to execute the synthesis of Leg  
143 from GDP-GlcNAc. Importantly, *B. subvibrioides* also encodes a FlmG ortholog (43 % identity and  
144 59% similarity to *C. crescentus* FlmG), raising the possibility that it uses FlmG to glycosylate its  
145 flagellins as *C. crescentus*. Yet, no obvious sequence homologs of the six Pse biosynthesis enzymes  
146 were found by BlastP searches, whereas orthologs of Leg biosynthesis enzymes are readily  
147 discernible. Thus, we reasoned that *B. subvibrioides* FlmG could be a Leg-specific flagellin  
148 glycosyltransferase, rather than a Pse-dependent enzyme as for *C. crescentus* [19].

149 To test this idea, we first confirmed that sugar modifications are indeed present on *B.*  
150 *subvibrioides* and *C. crescentus* flagella. For *C. crescentus*, flagellin glycosylation by Pse was  
151 inferred, but not yet chemically proven. We purified flagella from supernatants of *B. subvibrioides* and  
152 *C. crescentus* cultures by ultracentrifugation, dissociated covalently linked sugars by acid-hydrolysis,  
153 derivatized them and then analyzed the liberated material by HPLC (Figure S2A). A Pse-like molecule  
154 was extracted from *C. crescentus* flagella, having a retention time (9.8 minutes) that is nearly identical  
155 to that (9.7 minutes) of a Pse standard (harboring a triple acetamido modification, Pse4Ac5Ac7Ac)  
156 isolated from an *A. baumannii* capsule [34]. Co-injection of this Pse-standard along with the material  
157 extracted from *C. crescentus* flagella, revealed a co-eluting peak at 9.7 minutes of double intensity  
158 compared to that of the standard (Figure S2A). When the same procedure was used to liberate a  
159 derivatized nonulosonic acid from *B. subvibrioides* flagella, a major peak was detected by HPLC  
160 analysis having a retention time of 9.8 minutes, along with a minor one eluting at 15.3 minutes (Figure  
161 S2B). A known Leg standard with a double acetamide modification (Leg5Ac7Ac) isolated from a  
162 different *A. baumannii* capsule [35] eluted at 12.3 minutes, suggesting that *B. subvibrioides* flagella  
163 are modified with a Leg-derivative that is distinct from Leg5Ac7Ac. Indeed, Leg derivatives of different  
164 mass or just simply epimers are known with substitutions of the N-acetyl/acetamido groups at the C-5  
165 and C-7 positions, such as N-acetimidoyl or acetamidino, N-formyl and N-hydroxybutyryl groups [1,  
166 3], that are synthesized from a Leg-type biosynthesis pathway requiring LegI.

167 To determine if the gene predicted to encode the LegI-like synthase of *B. subvibrioides*  
168 (Bresu\_0507, henceforth LegI<sup>Bs</sup>) or the FlmG ortholog (Bresu\_2406, FlmG<sup>Bs</sup>) are also required for  
169 motility in *B. subvibrioides* ATCC15264, we engineered in-frame deletions in each gene. We then  
170 probed the resulting  $\Delta legI^{Bs}$  and  $\Delta flmG^{Bs}$  single mutants for motility defects in soft agar and analyzed  
171 flagellin glycosylation by immunoblotting using antibodies to FliJ<sup>Cc</sup> (Figure 3A-3D). Both mutants  
172 showed strongly reduced motility on soft agar and increased migration of flagellin through SDS-PAGE  
173 compared to *WT*. While no difference in the abundance of flagellin was observed in extracts from  
174 mutant versus *WT* cells, flagellin was barely detectable in the supernatants of mutant cultures,  
175 suggesting flagellar filament formation is defective in these mutants. Moreover, transmission electron  
176 microscopy (TEM, Figure 3E) revealed substantially shorter flagella on both mutants (average length  
177 1 or 1.2  $\mu\text{m}$ , Figure 3F) compared to those on *WT* cells (4  $\mu\text{m}$ ), suggesting that LegI<sup>Bs</sup> and FlmG<sup>Bs</sup>  
178 govern flagellin glycosylation and export (or stability after export). However, we cannot rule out that  
179 LegI<sup>Bs</sup> and FlmG<sup>Bs</sup> also promote filament assembly in addition to flagellin secretion. Flagellins are  
180 exported before their assembly into the filament [13, 14, 36], but when the assembly step is blocked  
181 they typically accumulate in the supernatant. In this situation, the resulting cells feature only a hook on  
182 the surface lacking the filament or possibly a very short stubby filament, similar to the ones revealed  
183 in our TEM images.

184 The impaired flagellar filament assembly observed in our mutants are clearly due the absence  
185 of LegI<sup>Bs</sup> or FlmG<sup>Bs</sup> as shown by the fact that introduction of a plasmid harboring either *legI*<sup>Bs</sup> or *flmG*<sup>Bs</sup>  
186 under control of the IPTG-inducible  $P_{lac}$  promoter into the corresponding mutants, restored motility as  
187 well as flagellin modification and export, whereas the empty vector (pSRK-Gm [37]) was unable to do  
188 so (Figure 3A-3D). Having confirmed the importance of LegI<sup>Bs</sup> and FlmG<sup>Bs</sup> in flagellin

189 modification/secretion and motility in complementation experiments, we asked if *C. crescentus* FlmG  
190 (FlmG<sup>Cc</sup>) can substitute for FlmG<sup>Bs</sup> and vice versa. These heterologous complementation experiments  
191 revealed that the FlmG variants are not interchangeable between *C. crescentus* and *B. subvibrioides*  
192 (Figure S3A), whereas the PseI<sup>Cc</sup> substitution experiments described above showed that PseI  
193 orthologs are functionally interchangeable (Figure 2). To test if such heterologous complementation is  
194 also possible for Leg synthases using the motility defect of *B. subvibrioides*  $\Delta$ legI<sup>Bs</sup> cells as proxy, we  
195 conducted the orthologous glyco-profiling for LegI orthologs expressed from pSRK-Gm plasmids as  
196 described above (Figure 4). Strikingly, we obtained a near mirror-image of the complementation  
197 results from the *C. crescentus*  $\Delta$ pseI<sup>Cc</sup> glyco-profiling: the orthologs that were unable to restore  
198 motility and flagellin glycosylation to *C. crescentus*  $\Delta$ pseI<sup>Cc</sup> cells, predominantly restored motility  
199 (Figure 4A) and flagellin glycosylation (Figure 4B) to *B. subvibrioides*  $\Delta$ legI<sup>Bs</sup> cells. Since these  
200 complementing synthases exhibit greater overall sequence similarity to LegI than Pse of *C. jejuni*  
201 11168 (Table S1), we concluded that *B. subvibrioides* indeed encodes a Leg-dependent flagellin  
202 glycosylation pathway. Thus, while the *C. crescentus* and *B. subvibrioides* flagellin glycosylation  
203 systems are clearly evolutionarily related, they diverged to exhibit dissimilar donor and acceptor  
204 specificities.

205

#### 206 **LegX, a new molecular marker for Leg biosynthesis pathways.**

207 Irrefutable molecular evidence for the complete dissection of glycosylation pathway typically  
208 requires the demonstration of sufficiency by reconstitution of glycosylation in a heterologous host  
209 expressing a minimal set of the required constituents. Since FlmG<sup>Cc</sup> and FlmG<sup>Bs</sup> are not  
210 interchangeable and the glycosyl donor and acceptor specificities must have diverged, we tried to  
211 reconstitute the *B. subvibrioides* flagellin glycosylation system in *C. crescentus* using heterologously  
212 expressed determinants. To this end, we expressed a synthetic operon of the six *B. subvibrioides* Leg  
213 biosynthesis enzymes (i.e. those predicted to be responsible for the production of CMP-Leg from  
214 GDP-GlcNAc, Figure 5A) from the *C. crescentus* xylX locus in cells lacking flagellins, PseI<sup>Cc</sup> and  
215 FlmG<sup>Cc</sup>. This synthetic Leg biosynthesis operon included the following CDSs of the predicted *B.*  
216 *subvibrioides* orthologs of the Leg pathway from *C. jejuni* 11168[22]: Bresu\_3266 (LegB), Bresu\_0765  
217 (LegC), Bresu\_0506 (LegH), Bresu\_3264 (LegG), Bresu\_0507 (LegI) and Bresu\_3265 (LegF)(Figure  
218 1 and 5A). Next, we introduced a plasmid co-expressing FljK<sup>Bs</sup> and FlmG<sup>Bs</sup> and then probed for  
219 modification of FljK<sup>Bs</sup> by immunoblotting, asking whether a change in migration of FljK<sup>Bs</sup> was  
220 discernible. As shown in Figure 5B, under these conditions the migration of FljK<sup>Bs</sup> was not altered,  
221 indicating that i) additional determinants are likely required to execute the glycosylation or that ii) the  
222 synthetic CDSs do not express well enough from our plasmids.

223 Previously we showed that an equivalent synthetic enzyme operon comprising six Pse  
224 biosynthesis enzymes was able to direct the synthesis of CMP-Pse from the UDP-GlcNAc precursor  
225 in a heterologous host [19]. On the basis of our failure with our corresponding synthetic Leg construct,  
226 we considered the possibility that Leg biosynthesis pathway might be incomplete in our heterologous  
227 host because the putative precursor, GDP-GlcNAc, is not naturally available in *C. crescentus* (and  
228 other bacteria that do not normally synthesize Leg). If true, then this essential biosynthetic activity



229 might also be encoded in Leg biosynthesis gene clusters of *B. subvibrioides* or other Leg-producing  
230 bacteria. Upon inspection of the predicted Leg biosynthesis clusters in the genomes of the Gram-  
231 negative bacteria *A. baumannii* LAC-4 (GCA\_000786735.1)[38] and *P. sp.* Irchel 3E13  
232 (GCA\_900187455.1), as well as that of the Gram-positive bacteria *Geobacillus kaustophilus* HTA426  
233 [26, 39] and *Moorella humiferrea* DSM 23265 [40], we noted the presence of one gene encoding an  
234 ortholog of PtmE, an enzyme that was used in the enzymatic reconstitution of Leg biosynthesis *in*  
235 *vitro* using enzymes encoded in *C. jejuni* 11168[22]. In these experiments PtmE, a putative  
236 guanylyltransferase of GlcN-1-P ( $\alpha$ -D-glucosamine-1-phosphate), promoted the production of GDP-  
237 GlcNAc *in vitro* (Figure 5A). An ortholog (Bresu\_3267, henceforth LegX<sup>Bs</sup>) is also encoded adjacent to  
238 the genes encoding LegB, LegG and LegF (Bresu\_3266, Bresu\_3264 and Bresu\_3265) orthologs in  
239 the *B. subvibrioides* genome (see Figure 1 and 5A).

240 If LegX<sup>Bs</sup> is indeed required for Leg biosynthesis in *B. subvibrioides*,  $\Delta legX$  cells should  
241 recapitulate the motility and flagellin glycosylation defect reported above for  $\Delta legI$  and  $\Delta flmG$  cells.  
242 We engineered an in-frame deletion mutation in *legX* and found that the resulting  $\Delta legX$  cells suffer  
243 from impaired motility (Figure 6A). Moreover, they neither glycosylate, nor export flagellin (Figure 6B)  
244 and TEM revealed only short flagellar filaments on the pole (Figure 6C), as for  $\Delta legI$  and  $\Delta flmG$  cells.  
245 If LegX indeed acts in Leg biosynthesis, then it might be possible to restore motility to  $\Delta legX$  cells by  
246 expression of a LegX/PtmE ortholog (Figure 6A, 6B), similarly to the heterologous complementation of  
247  $\Delta legI$  cells. This was indeed the case: expression of the *M. humiferrea* LegX ortholog (MOHU\_20790)  
248 from pSRK-Gm not only restored motility to  $\Delta legX$  cells, but also flagellin glycosylation and export in a  
249 manner indistinguishable from the complementation with LegX<sup>Bs</sup> (expressed from pSRK-Gm). As  
250 MOHU\_20790 exhibits 54% similarity (36% identity) to LegX<sup>Bs</sup> (Table S2), and the predicted fold of  
251 LegX (Figure 6D, right) closely resembles that of the nucleotidyltransferase PtmE (Figure 6D, left), we  
252 conclude that LegX enzymatic activity is required for motility and Leg biosynthesis in *B. subvibrioides*  
253 and that its function in motility can be conferred by LegX orthologs from phylogenetically distant  
254 bacteria, such as the Gram-positive bacterium *M. humiferrea*.

255 As the *legX* gene lies downstream of the predicted *legB* (Bresu\_3266) gene, we also  
256 inactivated *legB* and observed that the motility of the corresponding mutant ( $\Delta legB$ ) is curbed (Figure  
257 7A) and that flagellin glycosylation and export is defective (Figure 7B). However, complementation  
258 analyses with plasmids harboring either *legB* or *legB-legX* revealed that the  $\Delta legB$  mutation is polar  
259 on *legX* expression, indicating that these two genes indeed form an operon (Figure 7A, 7B). We also  
260 inactivated the predicted *legH* gene (Bresu\_0506) that lies upstream of *legI* (Bresu\_0507), but in this  
261 case there was no evidence of polarity (Figure 7D-7F), despite a similar apparent translational as  
262 inferred from the genome sequence. In summary, our analyses show that LegX, LegB and LegH are  
263 necessary for Leg- and FlmG-dependent flagellin glycosylation in *B. subvibrioides*. Importantly, LegX  
264 is an ideal marker to distinguish Leg from Pse biosynthesis pathways, often embedded in flagellar  
265 clusters [26] and, owing to its functional conservation, suitable for the establishment of glyco-profiling  
266 set-ups that rely on the motility defect of  $\Delta legX$  cells as proxy.

267

268 **Reconstitution and rewiring of FlmG-dependent flagellin glycosylation.**

269 Having unveiled LegX as a critical component of the *B. subvibrioides* Leg-based motility  
270 system, we asked whether addition of the LegX enzyme would permit reconstitution of the Leg-  
271 dependent flagellin glycosylation by FlmG<sup>Bs</sup> in our recombinant *C. crescentus* cells expressing the  
272 other six Leg biosynthesis enzymes. To this end, we transformed a compatible plasmid harboring *B.*  
273 *subvibrioides* LegX CDS (pMT375-*legX*) into the expression *C. crescentus* strains already described  
274 above that lack flagellins, PseI and FlmG and performed immunoblot to determine if FlmG<sup>Bs</sup> can  
275 support the modification of FliK<sup>Bs</sup> in Leg- and LegX-dependent manner. As shown in Figure 5B, FliK<sup>Bs</sup>  
276 was converted to a substantially slower migrating species, a modification that was dependent on the  
277 presence of FlmG<sup>Bs</sup> and all seven Leg biosynthesis enzymes (including LegX). Additionally, we  
278 observed a barely detectable change in mobility that is FlmG<sup>Bs</sup>-dependent, but requires neither Pse,  
279 nor Leg (see asterisk, Figure 5B). This change in FliK<sup>Bs</sup> mobility may reflect a certain degree of  
280 promiscuity of FlmG towards other donor molecules that are transferred to FliK<sup>Bs</sup>.

281 We hypothesized that the specificity of FlmG enzymes towards Leg versus Pse likely resides  
282 in the C-terminal glycosyltransferase (GT-B domain [41]). This hypothesis is based on our previous  
283 finding that the N-terminal TPR domain of FlmG<sup>Cc</sup> can bind FliK<sup>Cc</sup>, whereas the GT-B alone cannot  
284 [19]. Since FlmG<sup>Bs</sup> shares this modular architecture based on sequence analysis, we wondered if a  
285 chimeric version of FlmG<sup>Cc-Bs</sup> in which we substituted the GT-B domain from *C. crescentus* with that of  
286 *B. subvibrioides* would thus glycosylate *C. crescentus* flagellins with Leg. To this end, we used *C.*  
287 *crescentus*  $\Delta$ *flmG* mutant cells harboring the synthetic six-gene Leg operon at the *xyiX* locus. We first  
288 transformed these cells with pMT375-*legX*<sup>Bs</sup> and then finally with pSRK-Gm variants expressing either  
289 FlmG<sup>Cc</sup>, FlmG<sup>Bs</sup>, or the chimeric FlmG<sup>Cc-Bs</sup> version. As shown in Figure 5C, the chimeric FlmG<sup>Cc-Bs</sup>  
290 was able to modify the *C. crescentus* flagellins in a manner that depended on the presence of LegX<sup>Bs</sup>,  
291 but it did not modify flagellin in cells producing only Pse (also observed in Figure S3A). Moreover, WT  
292 FlmG<sup>Bs</sup> version did not support efficient flagellin modification in the Leg-producing *C. crescentus* cells  
293 regardless of whether LegX<sup>Bs</sup> was present or not (Figure 5C). As control, FlmG<sup>Cc</sup> also supported  
294 flagellin modification in this system (likely with Pse), because these  $\Delta$ *flmG* cells produce both Pse and  
295 Leg, but only in the presence of pMT375-*legX*<sup>Bs</sup>.

296 In summary, exchanging the C-terminal GT-B domain enabled rewiring the  
297 glycosyltransferase specificity from Pse-accepting enzyme to a Leg-accepting enzyme, resulting in  
298 the modification of *C. crescentus* flagellins with Leg in cells recombinantly expressing at least seven  
299 Leg biosynthesis genes. The fact that such cells are non-motile (Figure S3B) indicates that additional  
300 factors exist in the flagellation pathway that exhibit specificity towards the glycosyl group that is joined  
301 to flagellins.

302

## 303 DISCUSSION

### 304 Insulated Leg- or Pse-dependent glycosylation pathways

305 The exquisite specificity in cellular glycosylation reactions are predetermined to ensure that  
306 the desired structures are decorated with the correct sugars. In as much as the underlying glycosyl  
307 donor and acceptor selectivity underlie biological function, biotechnological processes often  
308 necessitate relaxing these specificities, for example in engineering promiscuous glycosyltransferase



309 (GT) enzymes that can be used to modify a desired target protein with a sugar of choice [42]. Such  
310 long-term goals are achievable, but ideally facilitated by the discovery and dissection of the  
311 determinants underpinning the GT specificities, including acceptor and donor. In addition to  
312 illuminating the molecular mechanism of FlmG fGTs, our work also opens the door towards  
313 biotechnological engineering of flagellin-based bio-glycoconjugates using Pse or Leg for example as  
314 simple vaccine [43-45] that could serve to combat Pse/Leg in infections by prior immunization not only  
315 for *A. baumannii* strains or other pathogens that decorate surfaces with Pse, but, importantly, also for  
316 those that contain Leg, including most clinical *A. baumannii* isolates [12, 34, 46].

317 Our genetic dissection of orthologous FlmG fGTs provided unprecedented insight into the  
318 donor sugar and acceptor protein specificities underlying protein glycosylation mechanisms. At the  
319 level of the donor, featuring a remarkable stereoisomer selectivity, we showed that the FlmGs from *C.*  
320 *crenscentus* and *B. subvibrioides* evolved a strong preference for either Leg or Pse (Figures 2 and 4).  
321 Additionally, the stereoisomer specificity of the donor is already reflected in the biosynthesis pathway.  
322 Inactivation of the defining synthase enzymes for Leg or Pse, LegI and PseI, yields the same motility  
323 defects as the inactivation of the corresponding FlmG enzyme. LegI and PseI cannot substitute for  
324 one another in the two flagellation systems that we studied, indicating that the corresponding  
325 biosynthesis pathways are genetically (and therefore biochemically) insulated. However, the fact that  
326 different PseI orthologs can substitute for the endogenous *C. crescentus* enzyme and, in turn, LegI  
327 orthologs can substitute for the endogenous enzyme from *B. subvibrioides* when probing motility,  
328 underscores the specificity of the biosynthesis pathways for the two stereoisomers. This stringency  
329 lends itself for *in vivo* glyco-profiling using  $\Delta pseI$  and  $\Delta legI$  mutant strains of *C. crescentus* and *B.*  
330 *subvibrioides*, respectively, to functionally probe for Pse or Leg biosynthesis pathways identified in  
331 genome searches. Remarkably, such profiling assays not only permit distinction among strains and  
332 species, but are also discriminatory across larger phylogenetic distances, including the Gram-positive  
333 to Gram-negative divide and even the boundaries between eubacterial and archaeal kingdoms. By  
334 extension, having recognized the LegX/PtmE enzyme as a critical element in the Leg-specific  
335 enzymatic biosynthesis step (Figure 6) likewise offers another functional, but also a novel  
336 bioinformatic, criterion for the correct assignment and discrimination of predicted stereoisomer  
337 biosynthesis routes residing in ever-expanding genome databases. The current era of synthetic  
338 biology offers unlimited depth to which such synthetic genetic glyco-profiling approaches can be  
339 applied.

340

### 341 **Specificity determinants in flagellin glycosyltransferases**

342 Our reconstituted Leg-dependent glycosylation of FljK<sup>BS</sup> by FlmG<sup>BS</sup> in *C. crescentus*  $\Delta pseI$   
343 cells using a synthetically assembled Leg-biosynthesis operon, complemented with LegX (Figure 5),  
344 allowed us to unambiguously establish the minimal set of components that are required to achieve  
345 protein glycosylation using a Leg-based system. The FlmG class of fGTs are suitable subjects for  
346 molecular dissection of the underlying specificity determinants because of their conspicuous two-  
347 domain architecture that is recognizable by simple primary structure (sequence) comparisons, even  
348 without tertiary structural analysis. In fact, the (predicted) bilobed FlmG structure [15] had previously

349 prompted us to determine that the N-terminal TPR domain of FlmG<sup>Cc</sup> confers flagellin (acceptor)  
350 recognition, whereas the GT-B domain cannot bind flagellin [19]. Hypothesizing that the GT-B domain  
351 could act as determinant for the donor, we considered a simple division of labor model between the  
352 two parts of FlmG accounting for the bipartite specificity. Proof for this notion came from the analysis  
353 of a chimeric form, FlmG<sup>Cc-Bs</sup>, in which the flagellin binding domain from FlmG<sup>Cc</sup> was joined to the GT-  
354 B domain of FlmG<sup>Bs</sup>. Expression of this chimeric FlmG<sup>Cc-Bs</sup> variant in *C. crescentus*  $\Delta$ *flmG* cells that  
355 had been engineered to synthesize Leg resulted in the modification of the *C. crescentus* flagellin,  
356 whereas the *WT* version of FlmG<sup>Bs</sup> had poor activity (Figure 5C). Conversely, FlmG<sup>Cc-Bs</sup> was unable to  
357 support glycosylation of *C. crescentus* flagellins with Pse, likely because it no longer possesses the  
358 Pse-specific GT-B domain of FlmG<sup>Cc</sup>.

359 Similar dissection experiments should be conducted with the other class of fGTs that are  
360 wide-spread in bacteria, the Mafs [10, 26, 28, 47, 48], to reveal if analogous mechanisms and  
361 determinants underpin flagellin glycosylation in these systems. It stands to reason that donor and  
362 acceptor specificities exist in Mafs as well, however, the flagellin recognition determinants remain  
363 unknown. An X-ray structure determined for the Maf from *M. magneticum* [28] revealed a tripartite  
364 domain architecture with central GT-A domain bearing clear resemblance to the GT29 and GT42  
365 family of sialyltransferases. The GT-A domain is a characteristic of the Mafs (also known as the  
366 signature MAF\_flag10 domain) and is likely to confer Pse donor specificity. In fact, our glyco-profiling  
367 revealed the corresponding synthase of *M. magneticum* to have PseI activity in our motility assay  
368 (Figure S1) and our sequence analysis by BlastP easily discerned a complete (predicted) Pse-  
369 biosynthesis pathway encoded in its genome. While the flagellin binding determinant was not evident  
370 in the *M. magneticum* Maf structure, a weak structural similarity with flagellin and flagellin secretion  
371 chaperones may point to a C-terminal flagellin recognition determinant. However, it remains to be  
372 determined whether this region is necessary and sufficient for flagellin binding.

373 Khairnar *et al.* [26] provided evidence of some donor promiscuity in the Maf from *G.*  
374 *kaustophilus* that is encoded in flagellar locus. When this Maf was expressed in recombinant  
375 *Escherichia coli* cells that synthesize sialic acid, modification of the co-expressed *G. kaustophilus*  
376 flagellin was seen with sialic acid. However, it would be interesting to test if the efficiency of flagellin  
377 glycosylation by *G. kaustophilus* Maf is increased in a heterologous host producing Leg as *maf* gene  
378 is adjacent to Leg biosynthesis genes, including a LegX ortholog (Table S2) and our glyco-profiling in  
379 Figure 4 revealed that *G. kaustophilus* indeed encodes a LegI ortholog. Overall, it remains to be  
380 determined whether the Mafs are inherently more promiscuous than the FlmG enzymes.

381

### 382 **Leg- and Pse-based glycosylation in the (same) prokaryotic cell**

383 The donor specificity observed with the two FlmG enzymes studies in our work and the  
384 possible specificity inferred for Maf-encoding gene clusters may ensure that the correct cellular  
385 structure is modified with the right donor. In our experiments when *C. crescentus* cell synthesizing  
386 Leg were used, FlmG<sup>Cc</sup> had a clear preference to modify flagellin with Pse, rather than Leg. Thus, the  
387 terminal determinant of a given glycosylation pathway governs selectivity of CMP-Pse over CMP-Leg  
388 or vice versa. Our work also indicates that the biosynthesis pathways themselves are kept insulated

389 by dedicated enzymes, perhaps to prevent the formation of Leg/Pse hybrid intermediates that would  
390 otherwise create too much chemical variability for the systems to function properly in their biological  
391 roles. Pse and Leg glycosylation systems are used for other cell surface structures, not only flagellins  
392 [1, 16, 49]. While Leg or Pse biosynthesis enzymes are often encoded in flagellar gene clusters, they  
393 can also occur within O-antigen or capsular gene clusters, sometimes even in the same genome. In  
394 this situation, a possible enzymatic interference of the Leg and Pse biosynthesis pathways must be  
395 avoided. In bacterial cells, it might be possible to restrict Leg or Pse synthesis to specific (mutually  
396 exclusive) growth conditions, but a perhaps more common solution is to design each biosynthetic  
397 pathway with specific chemical marks. An appealing hypothesis is that this is achieved with the  
398 synthesis of Leg from GDP-activated precursors, whereas Pse synthesis occurs from UDP-activated  
399 molecules [21, 22]. This dependency on GDP for Leg also comes at a price, since at least one  
400 specific conversion enzyme, such as LegX, is required to launch the biosynthesis pathway with the  
401 production of the activated precursor bearing the GDP mark (Figure 6).

402 For such chemical complexity in the biosynthesis of stereoisomers to evolve, these  
403 glycosylation systems must be of considerable value to cells, begging the question of their function.  
404 Do surface modifications with Pse or Leg just serve to generate epitopes or envelopes with different  
405 modifications or are there special physical or chemical properties associated with Pse or Leg. As  
406 members of the sialic family of molecules they certainly have the potential to function as innate  
407 immune modulators, but Leg or Pse also found on environmental bacteria that are not known to  
408 associate with eukaryotic cells. While Pse and Leg play an important role in *C. crescentus* and *B.*  
409 *subvibrioides* flagellation, respectively, many other flagellation systems exist that do not require Pse  
410 or Leg. On the basis of this fact, it is conceivable that glycosylation does not fulfill a conserved role in  
411 flagellar assembly in general, but we cannot exclude that it has been appropriated for regulatory  
412 purposes in some bacterial flagellation systems. We observed that modifying FliK<sup>Cc</sup> with Leg in our  
413 recombinant *C. crescentus* system still did not restore motility, suggesting that the type of sugar  
414 modification does matter, possibly because other flagellin interacting proteins such as the FlaF  
415 secretion chaperone, capping proteins or unknown factors no longer interact or function properly with  
416 FliK<sup>Cc</sup> that does not harbor the Pse modification. Alternatively, or additionally, it is conceivable that  
417 modification of the flagellar filament with Pse or Leg simply protects against infection by certain  
418 flagellotropic phages, in a manner analogous to that reported recently for pilus glycosylation in  
419 *Pseudomonas aeruginosa* [50].

420

## 421 **EXPERIMENTAL PROCEDURES**

### 422 **Strains and growth conditions**

423 Bacterial strains used in this study are listed in Table S3. *C. crescentus* and *B. subvibrioides* strains  
424 were grown at 30°C in peptone-yeast extract (PYE) (2g/L bacto-peptone, 1g/L yeast extract, 1 mM  
425 MgSO<sub>4</sub> and 0.5 mM CaCl<sub>2</sub>)[51]. *E. coli* S17-1  $\lambda$ pir and EC100D were grown at 37°C in LB. Antibiotics  
426 were added to the medium at the following concentration (µg/mL in liquid/solid medium for *C.*  
427 *crescentus* and *B. subvibrioides*; µg/mL in liquid/solid medium for *E. coli*): nalidixic acid (20 only in  
428 solid medium for *C. crescentus* and *B. subvibrioides*), tetracycline (1/1; 10/10), kanamycin (5/20;

429 20/20), gentamycin (1/1; 25/25). Gene expression was induced when required with 50  $\mu$ M vanillate,  
430 0.3% D-xylose or 0.5 mM isopropyl-beta-D-thiogalactoside (IPTG) for *C. crescentus* and *B.*  
431 *subvibrioides* cultures. Electroporation, bi-parental mating and motility assays were performed as  
432 previously described in *C. crescentus* and *B. subvibrioides* [51, 52].

433 For motility assays, 1  $\mu$ L of overnight cultures were spotted on soft (0.3%) agar plates with the  
434 corresponding antibiotics and inducers (IPTG or vanillate) and incubated for 3 days and 7 days for *C.*  
435 *crescentus* and *B. subvibrioides*, respectively.

436

#### 437 **Immunoblots**

438 For immunoblots, protein samples were prepared from cells harvested in the middle of the  
439 exponential growth phase (1 mL at OD<sub>600nm</sub>≈0.4). Proteins samples were separated on SDS  
440 polyacrylamide gel, transferred to polyvinylidene difluoride (PVDF) Immobilon-P membranes (Merck  
441 Millipore) and blocked in Tris-buffered saline (TBS) 0.1% Tween-20% and 5% dry milk [19]. The anti-  
442 FliJ<sup>Cc</sup> anti-serum (raised against His6-FliJ expressed in *E. coli* [19]) was used at 1:10,000 dilution.  
443 Protein-primary antibody complexes were revealed with horseradish peroxidase-labeled donkey anti-  
444 rabbit antibodies (Jackson ImmunoResearch, West Grove, PA) and ECL detection reagents  
445 (Amersham, GE Healthcare, Glattbrugg, Switzerland).

446

#### 447 **Negative stain transmission electron microscopy**

448 Samples for negative stain TEM were prepared by first glow discharging 200-mesh copper, carbon-  
449 coated, formvar grids (EM Science, Hatfield, PA) for 1 min. 20  $\mu$ L of exponential cultures of  
450 *B. subvibrioides* were applied to the grids and allowed to adsorb for 1 min before being washed three  
451 times in water, stained with 1% uranyl acetate for 1 min and washed with water for 30 sec. Negatively  
452 stained *B. subvibrioides* were imaged on a Tecnai 20 (FEI Company, Eindhoven, Netherland).  
453 Flagellum length measurement was performed using the ImageJ software.

454

#### 455 **Derivation of nonulosonic acids (NulOs) with DMB and analysis on HPLC**

456 We extracted NulOs from lyophilized purified flagella from culture supernatants. Briefly, 250 mL of an  
457 overnight culture (24 h for *B. subvibrioides*) was spun for 15 min at 8,000 r.p.m. at 4°C to remove  
458 cells. Shed flagella were then pelleted from the culture supernatant by ultracentrifugation at (27,000  
459 r.p.m. 30 min, 15°C), washed with 50 mL water and pelleted again by ultracentrifugation. Purified  
460 flagella were resuspended in water and frozen at -80°C prior to lyophilization. 1,2-diamino-4,5-  
461 methylene dioxybenzene (DMB) was used to derivatize NulOs as previously described [28]. Briefly,  
462 dried glycoconjugates were hydrolyzed in 0.1 M trifluoroacetic acid for 2 h at 80°C to release NulOs.  
463 NulOs were coupled to DMB for 2 h at 50°C in the dark in a derivation solution (7 mM DMB; 1 M  $\beta$ -  
464 mercaptoethanol; 18 mM sodium hydrosulfite; 0.02 mM trifluoroacetic acid). NulO derivatives were  
465 separated isocratically on a C<sub>18</sub> reverse-phase HPLC column (Thermo Scientific, Hypersil ODS, 4.6  
466 mm by 250 mm, 5  $\mu$ m) using acetonitrile/methanol/water (7:9:84 vol/vol/vol) mixture solvent and  
467 detected by a fluorimeter (Waters 2475, excitation wavelength  $\lambda_{exc}$ =373 nm, emission wavelength  
468  $\lambda_{em}$ =448 nm.

469

#### 470 **Strain and plasmid constructions**

471 For in-frame deletions, bi-parental mating was used to deliver the corresponding pNPTS138  
472 derivatives (listed in [Table S3](#)) into *B. subvibrioides* strains. Double recombination was selected by  
473 plating bacteria onto PYE plates supplemented with 3% sucrose. Putative mutants were confirmed by  
474 PCR using primers (listed in [Table S4](#)) external to the DNA fragments used for the pNPTS138  
475 constructs.

476

477 pNK562: PCR was used to amplify two fragments flanking the *flmG* (*Bresu\_2406*) ORF with  
478 Bs\_flmG\_del\_1/Bs\_flmG\_del\_2 and Bs\_flmG\_del\_3/Bs\_flmG\_del\_4. The PCR fragments were  
479 digested with *MfeI/BamHI* and *BamHI/HindIII*, respectively and triple ligated into pNPTS138 restricted  
480 with *EcoRI/HindIII*.

481

482 pNK580: PCR was used to amplify two fragments flanking the *neuB* (*Bresu\_0507*) ORF with  
483 Bs\_neuB\_del\_1/Bs\_neuB\_del\_2 and Bs\_neuB\_del\_3/Bs\_neuB\_del\_4. The PCR fragments were  
484 digested with *EcoRI/BamHI* and *BamHI/HindIII*, respectively and triple ligated into pNPTS138  
485 restricted with *EcoRI/HindIII*.

486

487 pNK926: PCR was used to amplify two fragments flanking the *Bresu\_3266* ORF with NK339/NK340  
488 and NK341/342. The PCR fragments were digested with *HindIII/BamHI* and *BamHI/EcoRI*,  
489 respectively and triple ligated into pNPTS138 restricted with *EcoRI/HindIII*.

490

491 pNK1000: PCR was used to amplify two fragments flanking the *Bresu\_3267* ORF with NK345/NK346  
492 and NK347/348. The PCR fragments were digested with *HindIII/KpnI* and *KpnI/EcoRI*, respectively  
493 and ligated into pNPTS138 restricted with *EcoRI/HindIII*.

494

495 pNK1002: PCR was used to amplify two fragments flanking the *Bresu\_0506* ORF with NK366/NK367  
496 and NK368/369. The PCR fragments were digested with *HindIII/BamHI* and *BamHI/EcoRI*,  
497 respectively and ligated into pNPTS138 restricted with *EcoRI/HindIII*.

498

499 Inducible plasmids were constructed with a *NdeI* site overlapping the start codon and an *XbaI* site (or  
500 *EcoRI* site when mentioned) flanking the stop codon were constructed as follows:

501

502 pNK660: the *flmG* ORF was amplified by PCR with Bs-flmG-*NdeI*/ Bs-flmG-*XbaI*. The PCR fragment  
503 was digested by *NdeI/XbaI* and ligated into pSRK-Gm [37] restricted with *NdeI/XbaI*.

504 pNK631: the synthetic fragment encoding the *legI* (*Bresu\_0507*) CDS, codon optimized for *E. coli*  
505 (see Table X), was subcloned into pSRK-Gm from pUCIDT plasmid using *NdeI/XbaI*.

506

507 pNK948: the *Bresu\_3266* CDS was amplified by PCR with NK357/358. The PCR fragment was  
508 digested by *NdeI/XbaI* and ligated into pSRK-Gm restricted with *NdeI/XbaI*.

509

510 pNK950: the *Bresu\_3267* CDS was amplified by PCR with NK359/360. The PCR fragment was  
511 digested by *NdeI/XbaI* and ligated into pSRK-Gm restricted with *NdeI/XbaI*.

512

513 pNK988: the *Bresu\_3266-67* CDSs were amplified by PCR with NK357/360. The PCR fragment was  
514 digested by *NdeI/XbaI* and ligated into pSRK-Gm restricted with *NdeI/XbaI*.

515

516 pNK974: the *Bresu\_0506* CDS was amplified by PCR with NK374/375. The PCR fragment was  
517 digested by *NdeI/XbaI* and ligated into pSRK-Gm restricted with *NdeI/XbaI*.

518

519 pNK957: the *Bresu\_3267* CDS was amplified by PCR with NK359/360, digested by *NdeI/XbaI* and  
520 cloned into pMT375.

521

522 pSA228: the synthetic fragment encoding *fijk<sup>Bs</sup>* (*Bresu\_2638*, codon optimised for *C. crescentus*)  
523 CDS was digested by *NdeI/EcoRI* and ligated into pMT463 [53] restricted by *NdeI/EcoRI*.

524

525 pLT2043: the *neuB* CDS of *Pseudomonas irchel* 3A5 was amplified with  
526 3A5\_PseI\_NdeI/3A5\_PseI\_mfeI. The PCR fragment was digested by *NdeI/MfeI* and ligated into  
527 pMT335 restricted with *NdeI/EcoRI*.

528

529 pLT2036: the *legI* CDS of *B. subvibrioides* was amplified with Bs\_neuB\_nde/Bs\_neuB\_eco. The PCR  
530 fragment was digested by *NdeI/EcoRI* and ligated into pMT335 [53] restricted with *NdeI/EcoRI*.

531

532 pLT2237: the *pseI* CDS of *Kurthia* was amplified with Ku\_neuB\_nde/Ku\_neuB\_eco. The PCR  
533 fragment was digested by *NdeI/EcoRI* and ligated into pMT335 restricted with *NdeI/EcoRI*.

534

535 pLT2262: the *pseI* CDS of *M. magneticum* was amplified with Mm\_neuB\_nde/Mm\_neuB\_eco. The  
536 PCR fragment was digested by *NdeI/EcoRI* and ligated into pMT335 restricted with *NdeI/EcoRI*.

537

538 pLT2263: the *pseI* CDS of *S. oneidensis* was amplified with So\_neuB\_nde/So\_neuB\_eco. The PCR  
539 fragment was digested by *NdeI/EcoRI* and ligated into pMT335 restricted with *NdeI/EcoRI*.

540

541 To create the vector co-expressing *fijk<sup>Bs</sup>* and *flmG<sup>Bs</sup>*, the *flmG* ORF was amplified by PCR with  
542 primers Bs\_flmG\_rbs\_Eco/Bs\_flmG\_Xba (with ribosome binding site and EcoRI site flanking the *flmG*  
543 start codon and XbaI site flanking the *flmG* stop codon) and digested by *EcoRI/XbaI*. The digested  
544 fragment was subcloned into pSA228[19] restricted by *EcoRI/XbaI*.

545

546 To express the *legX* ortholog from *Moorella humiferrea*, the *MOHU\_20790* ORF (codon optimized for  
547 *E. coli*) was amplified by PCR using NK361 and M13(-48) primers from pUC-GW-MOHU\_20790syn



548 plasmid. After digestion by *Nde*I/*Xba*I, the fragment was ligated into pSRK-Gm restricted by *Nde*I/*Xba*I  
549 to generate pNK955.

550

551 pLT2295: to express the six enzyme *B. subvibrioides* legionaminic acid biosynthesis pathway in  
552 *C. crescentus*, a synthetic operon (codon-optimized for *E. coli*, see [Table S4](#)) encoding Bresu\_3266,  
553 Bresu\_0765, Bresu-0506, Bresu-3264, Bresu-0507 and Bresu-3265 was subcloned from pUC-GW  
554 plasmid to pXGFP4 using *Nde*I/*Xba*I.

555

556 To express *pseI*<sup>Cj</sup>, *legI*<sup>Cj</sup> and *neuB*<sup>Cj</sup>, the corresponding CDSs were individually subcloned from  
557 pSA126, pSA47 and pSA48 [19] to pSRK-Gm using *Nde*I/*Xba*I to generate pNK991, pNK992 and  
558 pNK994, respectively.

559

560 To express heterologous *PseI* or *LegI* orthologs, the synthetic fragments harboring the CDSs (codon  
561 optimized for *E. coli*, see [Table S4](#)) were subcloned from pUC-GW or pUCIDT plasmids to pSRK-Gm  
562 using *Nde*I/*Xba*I ([Table S3](#)).

563

## 564 REFERENCES

565

- 566 1. McDonald, N.D., and Boyd, E.F. (2021). Structural and Biosynthetic Diversity of  
567 Nonulosonic Acids (NuLOs) That Decorate Surface Structures in Bacteria. *Trends*  
568 *Microbiol* 29, 142-157.
- 569 2. Varki, A., Schnaar, R.L., and Schauer, R. (2015). Sialic Acids and Other Nonulosonic  
570 Acids. In *Essentials of Glycobiology*, rd, A. Varki, R.D. Cummings, J.D. Esko, P. Stanley,  
571 G.W. Hart, M. Aebi, A.G. Darvill, T. Kinoshita, N.H. Packer, et al., eds. (Cold Spring  
572 Harbor (NY)), pp. 179-195.
- 573 3. Zunk, M., and Kiefel, M.J. (2014). The occurrence and biological significance of the  
574 [small alpha]-keto-sugars pseudaminic acid and legionaminic acid within pathogenic  
575 bacteria. *RSC Advances* 4, 3413-3421.
- 576 4. Le Quere, A.J., Deakin, W.J., Schmeisser, C., Carlson, R.W., Streit, W.R., Broughton,  
577 W.J., and Forsberg, L.S. (2006). Structural characterization of a K-antigen capsular  
578 polysaccharide essential for normal symbiotic infection in *Rhizobium* sp. NGR234:  
579 deletion of the *rkpMNO* locus prevents synthesis of 5,7-diacetamido-3,5,7,9-  
580 tetradeoxy-non-2-ulosonic acid. *J Biol Chem* 281, 28981-28992.
- 581 5. Knirel, Y.A., Shashkov, A.S., Tsvetkov, Y.E., Jansson, P.E., and Zahringer, U. (2003).  
582 5,7-diamino-3,5,7,9-tetradeoxynon-2-ulosonic acids in bacterial glycopolymers:  
583 chemistry and biochemistry. *Adv Carbohydr Chem Biochem* 58, 371-417.
- 584 6. Tomek, M.B., Janesch, B., Maresch, D., Windwarder, M., Altmann, F., Messner, P.,  
585 and Schaffer, C. (2017). A pseudaminic acid or a legionaminic acid derivative  
586 transferase is strain-specifically implicated in the general protein O-glycosylation  
587 system of the periodontal pathogen *Tannerella forsythia*. *Glycobiology* 27, 555-567.
- 588 7. Horzempa, J., Dean, C.R., Goldberg, J.B., and Castric, P. (2006). *Pseudomonas*  
589 *aeruginosa* 1244 pilin glycosylation: glycan substrate recognition. *J Bacteriol* 188,  
590 4244-4252.

- 591 8. Thibault, P., Logan, S.M., Kelly, J.F., Brisson, J.R., Ewing, C.P., Trust, T.J., and Guerry,  
592 P. (2001). Identification of the carbohydrate moieties and glycosylation motifs in  
593 *Campylobacter jejuni* flagellin. *J Biol Chem* **276**, 34862-34870.
- 594 9. Schirm, M., Soo, E.C., Aubry, A.J., Austin, J., Thibault, P., and Logan, S.M. (2003).  
595 Structural, genetic and functional characterization of the flagellin glycosylation  
596 process in *Helicobacter pylori*. *Mol Microbiol* **48**, 1579-1592.
- 597 10. Meng, X., Boons, G.J., Wosten, M., and Wennekes, T. (2021). Metabolic Labeling of  
598 Legionaminic acid in Flagellin Glycosylation of *Campylobacter jejuni* Identifies Maf4  
599 as a Putative Legionaminyl Transferase. *Angew Chem Int Ed Engl*.
- 600 11. Andolina, G., Wei, R., Liu, H., Zhang, Q., Yang, X., Cao, H., Chen, S., Yan, A., Li, X.D.,  
601 and Li, X. (2018). Metabolic Labeling of Pseudaminic Acid-Containing Glycans on  
602 Bacterial Surfaces. *ACS Chemical Biology* **13**, 3030-3037.
- 603 12. Wei, R., Yang, X., Liu, H., Wei, T., Chen, S., and Li, X. (2021). Synthetic Pseudaminic-  
604 Acid-Based Antibacterial Vaccine Confers Effective Protection against *Acinetobacter*  
605 *baumannii* Infection. *ACS Cent Sci* **7**, 1535-1542.
- 606 13. Nedeljković, M., Sastre, D.E., and Sundberg, E.J. (2021). Bacterial Flagellar Filament:  
607 A Supramolecular Multifunctional Nanostructure. *International Journal of Molecular*  
608 *Sciences* **22**, 7521.
- 609 14. Chevance, F.F., and Hughes, K.T. (2008). Coordinating assembly of a bacterial  
610 macromolecular machine. *Nature reviews. Microbiology* **6**, 455-465.
- 611 15. Kint, N., Unay, J., and Viollier, P.H. (2022). Specificity and modularity of flagellin  
612 nonulosonic acid glycosyltransferases. *Trends Microbiol* **30**, 109-111.
- 613 16. Szymanski, C.M., and Wren, B.W. (2005). Protein glycosylation in bacterial mucosal  
614 pathogens. *Nature reviews. Microbiology* **3**, 225-237.
- 615 17. Valguarnera, E., Kinsella, R.L., and Feldman, M.F. (2016). Sugar and Spice Make  
616 Bacteria Not Nice: Protein Glycosylation and Its Influence in Pathogenesis. *Journal of*  
617 *Molecular Biology* **428**, 3206-3220.
- 618 18. Harding, C.M., and Feldman, M.F. (2019). Glycoengineering bioconjugate vaccines,  
619 therapeutics, and diagnostics in *E. coli*. *Glycobiology* **29**, 519-529.
- 620 19. Ardisson, S., Kint, N., and Viollier, P.H. (2020). Specificity in glycosylation of multiple  
621 flagellins by the modular and cell cycle regulated glycosyltransferase FlmG. *Elife* **9**.
- 622 20. Friedrich, V., Janesch, B., Windwarder, M., Maresch, D., Braun, M.L., Megson, Z.A.,  
623 Vinogradov, E., Goneau, M.F., Sharma, A., Altmann, F., et al. (2017). *Tannerella*  
624 *forsythia* strains display different cell-surface nonulosonic acids: biosynthetic  
625 pathway characterization and first insight into biological implications. *Glycobiology*  
626 **27**, 342-357.
- 627 21. Schoenhofen, I.C., McNally, D.J., Brisson, J.R., and Logan, S.M. (2006). Elucidation of  
628 the CMP-pseudaminic acid pathway in *Helicobacter pylori*: synthesis from UDP-N-  
629 acetylglucosamine by a single enzymatic reaction. *Glycobiology* **16**, 8C-14C.
- 630 22. Schoenhofen, I.C., Vinogradov, E., Whitfield, D.M., Brisson, J.R., and Logan, S.M.  
631 (2009). The CMP-legionaminic acid pathway in *Campylobacter*: biosynthesis  
632 involving novel GDP-linked precursors. *Glycobiology* **19**, 715-725.
- 633 23. Lewis, A.L., Desa, N., Hansen, E.E., Knirel, Y.A., Gordon, J.I., Gagneux, P., Nizet, V.,  
634 and Varki, A. (2009). Innovations in host and microbial sialic acid biosynthesis  
635 revealed by phylogenomic prediction of nonulosonic acid structure. *Proc Natl Acad*  
636 *Sci U S A* **106**, 13552-13557.

- 637 24. Vieira, A.Z., Raittz, R.T., and Faoro, H. (2021). Origin and evolution of nonulosonic  
638 acid synthases and their relationship with bacterial pathogenicity revealed by a  
639 large-scale phylogenetic analysis. *Microb Genom* 7.
- 640 25. Chidwick, H.S., and Fascione, M.A. (2020). Mechanistic and structural studies into  
641 the biosynthesis of the bacterial sugar pseudaminic acid (Pse5Ac7Ac). *Org Biomol*  
642 *Chem* 18, 799-809.
- 643 26. Khairnar, A., Sunsunwal, S., Babu, P., and Ramya, T.N.C. (2020). Novel  
644 serine/threonine-O-glycosylation with N-acetylneuraminic acid and 3-deoxy-D-  
645 manno-octulosonic acid by bacterial flagellin glycosyltransferases. *Glycobiology* 31,  
646 288-306.
- 647 27. Bubendorfer, S., Ishihara, M., Dohlich, K., Heiss, C., Vogel, J., Sastre, F., Panico, M.,  
648 Hitchen, P., Dell, A., Azadi, P., et al. (2013). Analyzing the modification of the  
649 *Shewanella oneidensis* MR-1 flagellar filament. *PLoS One* 8, e73444.
- 650 28. Sulzenbacher, G., Roig-Zamboni, V., Lebrun, R., Guerardel, Y., Murat, D., Mansuelle,  
651 P., Yamakawa, N., Qian, X.X., Vincentelli, R., Bourne, Y., et al. (2018). Glycosylate and  
652 move! The glycosyltransferase Maf is involved in bacterial flagella formation. *Environ*  
653 *Microbiol* 20, 228-240.
- 654 29. Faulds-Pain, A., Birchall, C., Aldridge, C., Smith, W.D., Grimaldi, G., Nakamura, S.,  
655 Miyata, T., Gray, J., Li, G., Tang, J.X., et al. (2011). Flagellin redundancy in *Caulobacter*  
656 *crescentus* and its implications for flagellar filament assembly. *J Bacteriol* 193, 2695-  
657 2707.
- 658 30. Montemayor, E.J., Ploscariu, N.T., Sanchez, J.C., Parrell, D., Dillard, R.S., Shebelut,  
659 C.W., Ke, Z., Guerrero-Ferreira, R.C., and Wright, E.R. (2021). Flagellar Structures  
660 from the Bacterium *Caulobacter crescentus* and Implications for Phage varphi CbK  
661 Predation of Multiflagellin Bacteria. *J Bacteriol* 203.
- 662 31. Ely, B., Ely, T.W., Crymes, W.B., Jr., and Minnich, S.A. (2000). A family of six flagellin  
663 genes contributes to the *Caulobacter crescentus* flagellar filament. *Journal of*  
664 *bacteriology* 182, 5001-5004.
- 665 32. Butaite, E., Baumgartner, M., Wyder, S., and Kummerli, R. (2017). Siderophore  
666 cheating and cheating resistance shape competition for iron in soil and freshwater  
667 *Pseudomonas* communities. *Nat Commun* 8, 414.
- 668 33. Marks, M.E., Castro-Rojas, C.M., Teiling, C., Du, L., Kapatral, V., Walunas, T.L., and  
669 Crosson, S. (2010). The genetic basis of laboratory adaptation in *Caulobacter*  
670 *crescentus*. *J Bacteriol* 192, 3678-3688.
- 671 34. Kenyon, J.J., Arbatsky, N.P., Shneider, M.M., Popova, A.V., Dmitrenok, A.S.,  
672 Kasimova, A.A., Shashkov, A.S., Hall, R.M., and Knirel, Y.A. (2019). The K46 and K5  
673 capsular polysaccharides produced by *Acinetobacter baumannii* NIPH 329 and SDF  
674 have related structures and the side-chain non-ulosonic acids are 4-O-acetylated by  
675 phage-encoded O-acetyltransferases. *PLoS One* 14, e0218461.
- 676 35. Shashkov, A.S., Senchenkova, S.N., Popova, A.V., Mei, Z., Shneider, M.M., Liu, B.,  
677 Mirosnikov, K.A., Volozhantsev, N.V., and Knirel, Y.A. (2015). Revised structure of  
678 the capsular polysaccharide of *Acinetobacter baumannii* LUH5533 (serogroup O1)  
679 containing di-N-acetyllegionaminic acid. *Russian Chemical Bulletin* 64, 1196-1199.
- 680 36. Nedeljkovic, M., Postel, S., Pierce, B.G., and Sundberg, E.J. (2021). Molecular  
681 Determinants of Filament Capping Proteins Required for the Formation of Functional  
682 Flagella in Gram-Negative Bacteria. *Biomolecules* 11.

- 683 37. Khan, S.R., Gaines, J., Roop, n., R Martin, and Farrand, S.K. (2008). Broad-host-range  
684 expression vectors with tightly regulated promoters and their use to examine the  
685 influence of TraR and TraM expression on Ti plasmid quorum sensing. *Appl Environ*  
686 *Microbiol* **74**, 5053-5062.
- 687 38. Ou, H.-Y., Kuang, S.N., He, X., Molgora, B.M., Ewing, P.J., Deng, Z., Osby, M., Chen,  
688 W., and Xu, H.H. (2015). Complete genome sequence of hypervirulent and outbreak-  
689 associated *Acinetobacter baumannii* strain LAC-4: epidemiology, resistance genetic  
690 determinants and potential virulence factors. *Scientific Reports* **5**, 8643.
- 691 39. Takami, H., Takaki, Y., Chee, G.-J., Nishi, S., Shimamura, S., Suzuki, H., Matsui, S., and  
692 Uchiyama, I. (2004). Thermoadaptation trait revealed by the genome sequence of  
693 thermophilic *Geobacillus kaustophilus*. *Nucleic Acids Research* **32**, 6292-6303.
- 694 40. Poehlein, A., Keyl, A., Milsch, J.C., and Daniel, R. (2018). Draft Genome Sequence of  
695 the Thermophilic Acetogen *Moorella humiferrea* DSM 23265. *Genome*  
696 *Announcements* **6**, e00357-00318.
- 697 41. Breton, C., Šnajdrová, L., Jeanneau, C., Koča, J., and Imberty, A. (2005). Structures  
698 and mechanisms of glycosyltransferases. *Glycobiology* **16**, 29R-37R.
- 699 42. Keys, T.G., and Aebi, M. (2017). Engineering protein glycosylation in prokaryotes.  
700 *Current Opinion in Systems Biology* **5**, 23-31.
- 701 43. Cuccui, J., and Wren, B. (2015). Hijacking bacterial glycosylation for the production of  
702 glycoconjugates, from vaccines to humanised glycoproteins. *J Pharm Pharmacol* **67**,  
703 338-350.
- 704 44. Kay, E., Cuccui, J., and Wren, B.W. (2019). Recent advances in the production of  
705 recombinant glycoconjugate vaccines. *npj Vaccines* **4**, 16.
- 706 45. Micoli, F., Adamo, R., and Costantino, P. (2018). Protein Carriers for Glycoconjugate  
707 Vaccines: History, Selection Criteria, Characterization and New Trends. *Molecules* **23**.
- 708 46. Kenyon, J.J., and Hall, R.M. (2013). Variation in the complex carbohydrate  
709 biosynthesis loci of *Acinetobacter baumannii* genomes. *PLoS One* **8**, e62160.
- 710 47. Parker, J.L., Lowry, R.C., Couto, N.A., Wright, P.C., Stafford, G.P., and Shaw, J.G.  
711 (2014). Maf-dependent bacterial flagellin glycosylation occurs before chaperone  
712 binding and flagellar T3SS export. *Mol Microbiol* **92**, 258-272.
- 713 48. van Alphen, L.B., Wuhrer, M., Bleumink-Pluym, N.M.C., Hensbergen, P.J., Deelder,  
714 A.M., and van Putten, J.P.M. (2008). A functional *Campylobacter jejuni maf4* gene  
715 results in novel glycoforms on flagellin and altered autoagglutination behaviour.  
716 *Microbiology (Reading)* **154**, 3385-3397.
- 717 49. Nothaft, H., and Szymanski, C.M. (2010). Protein glycosylation in bacteria: sweeter  
718 than ever. *Nature reviews. Microbiology* **8**, 765-778.
- 719 50. Harvey, H., Bondy-Denomy, J., Marquis, H., Sztanko, K.M., Davidson, A.R., and  
720 Burrows, L.L. (2018). *Pseudomonas aeruginosa* defends against phages through type  
721 IV pilus glycosylation. *Nat Microbiol* **3**, 47-52.
- 722 51. Ely, B. (1991). Genetics of *Caulobacter crescentus*. *Methods Enzymol.* **204**, 372-384.
- 723 52. Curtis, P.D., and Brun, Y.V. (2014). Identification of essential alphaproteobacterial  
724 genes reveals operational variability in conserved developmental and cell cycle  
725 systems. *Mol Microbiol*.
- 726 53. Thanbichler, M., Iniesta, A.A., and Shapiro, L. (2007). A comprehensive set of  
727 plasmids for vanillate- and xylose-inducible gene expression in *Caulobacter*  
728 *crescentus*. *Nucleic Acids Research* **35**, e137.
- 729

730 **ACKNOWLEDGEMENTS**

731 We thank Laurence Degeorges for excellent technical assistance and Silvia Ardissonne for the  
732 plasmids expressing *B. subvibrioides* flagellins and FlmG. We also thank Bohumil Maco for the help  
733 with TEM experiments. Funding support was from the Swiss National Science Foundation  
734 (31003A\_182576), the University of Geneva (DIP) and UNITEC (InnogapR23-24) to P.H.V, and a  
735 Swisslife Foundation (Jubiläumsstiftung) grant for medical research to N.K..

736

737 **FIGURE LEGENDS**

738 **Figure 1.** Model of flagellin glycosylation pathway in *B. subvibrioides* (*B.s.*) and *C. crescentus* (*C.c.*).

739 Schematic of the *B.s.* and *C.c.* flagellum with the MS- and C-ring structures (in blue) inserted in the  
740 inner membrane (IM), the hook basal-body (HBB, in red) components spanning the periplasm with  
741 peptidoglycan layer (PG) and outer membrane (OM) and the flagellar filament (in green). The  
742 legionaminic acid (Leg, 5,7-diacetamido-3,5,7,9-tetradecoxy-d-glycero-d-galacto-non-2-ulosonic acid,  
743 structure shown on the left, red star) and pseudaminic acid (Pse, 5,7-diacetamido-3,5,7,9-tetradecoxy-  
744 l-glycero-l-manno-non-2-ulosonic acid, structure shown on the right, yellow shape) biosynthesis  
745 pathways that are present in *B.s.* and *C.c.*, respectively, are shown with the (predicted) sequential  
746 enzymatic steps. Shown in parenthesis are the respective enzymes that perform the equivalent  
747 reaction in *Campylobacter jejuni*. Activated legionaminic acid (CMP-Leg) and pseudaminic acid  
748 (CMP-Pse) are transferred to the flagellins subunits (green shape) by FlmG prior to flagellin secretion  
749 through the flagellar secretion apparatus and their subsequent assembly into a flagellar filament on  
750 the cell surface.

751

752 **Figure 2.** Heterologous complementation of *C. crescentus*  $\Delta$ *pseI* cells with candidate pseudaminic  
753 acid synthase (Psel) enzymes and legionaminic acid synthase (LegI) enzymes.

754 (A) Motility assay of *C.c.*  $\Delta$ *pseI* cells expressing predicted Leg or Pse synthases (LegI or Psel, in  
755 yellow or red, respectively) from  $P_{lac}$  on pSRK-Gm. Overnight cultures were spotted on PYE soft  
756 (0.3%) agar plates with gentamycin and IPTG (0.5 mM) and incubated for 3 days at 30°C. Only  
757 predicted Psel-like synthase coding sequences (CDSs) restore motility of the *C.c.*  $\Delta$ *pseI* cells. Note  
758 that the predicted synthases labeled in white do not share similarities with LegI or Psel of *C. jejuni*.

759 (B) Immunoblot of cell extracts from cells in (A) probed with antibodies to *C. crescentus* FljK (FljK<sup>Cc</sup>).  
760 The migration of flagellins in  $\Delta$ *pseI* cells is shifted towards lower molecular mass suggesting that post-  
761 translational modification of flagellin is defective in  $\Delta$ *pseI* mutant. Molecular sizes are indicated by the  
762 blue lines (in kDa). Bl: *Brevundimonas lutea*, Bv: *Brevundimonas viscosa*, Dv: *Dermabacter*  
763 *vaginalis*, Li: *Leptospira interrogans*, Tp: *Treponema pallidum*, Td: *Treponema denticola*, Ab<sup>ACICU</sup>:  
764 *Acinetobacter baumannii* ACICU, Ab<sup>LUH</sup>: *Acinetobacter baumannii* LUH, Ab<sup>LAC</sup>: *Acinetobacter*  
765 *baumannii* LAC-4, Lp: *Legionella pneumophila*, Pa<sup>Y82</sup>: *Pseudomonas aeruginosa* Y82, Pa<sup>PAPS475</sup>:  
766 *Pseudomonas aeruginosa* PAPS475, Sj: *Shewanella japonicum*, Basu: *Bacillus subtilis*, Ks: *Kurthia*  
767 *sibirica*, Cb: *Clostridium botulinum*, Gk: *Geobacillus kaustophilus*, Mh: *Moorella humiferrea*, Myco:  
768 *Mycobacterium sp. KS0706*, HrrPV6: *Halorubrum sp. PV6*, Ms: *Methanobrevibacter smithii*. All the  
769 genes come from synthetic fragments codon optimized for *E. coli* (except the synthase CDS from Gk

770 that is codon optimized for *C.c.*). Empty carets indicate the position of modified (glycosylated)  
771 flagellin, whereas filled carets mark unmodified flagellin. Red boxes indicate Psel functional orthologs.  
772

773 **Figure 3.** The LegI synthase ortholog and the FlmG glycosyltransferase ortholog are important for  
774 motility, flagellin glycosylation and secretion in *B. subvibrioides*.

775 (A) and (B) Motility assays of *WT*,  $\Delta legI$  (A) and  $\Delta flmG$  (B) *B.s.* cells. Overnight cultures of *WT* and  
776 mutants harboring the empty pSRK-Gm vector (+P<sub>lac</sub>) or the corresponding complementing plasmid  
777 were spotted on PYE soft agar plates with gentamycin and IPTG (0.5 mM) and incubated for 7 days  
778 at 30°C.

779 (C) and (D) Immunoblots of cell extracts (cells) and supernatants (SN) of cultures from *WT* and  
780 mutant cells probed with antibodies to FljK<sup>Cc</sup>. The estimated molecular mass (in kDa) are indicated by  
781 the blue lines on the left. Empty carets indicate the position of modified (glycosylated) flagellin,  
782 whereas filled carets mark unmodified flagellin.

783 (E) Transmission electron microscopy (TEM) analyses of negatively stained *WT*,  $\Delta legI$  and  $\Delta flmG$  *B.s.*  
784 cells.

785 (F) Flagellum length measurements determined by TEM of *WT* and mutants *B.s.* cell: *WT*,  $\Delta legX$   
786 ( $\Delta Bresu\_3267$ ),  $\Delta legB$  ( $\Delta Bresu\_3266$ ) expressing *legX* in *trans* from P<sub>lac</sub> on a plasmid,  $\Delta legH$   
787 ( $\Delta Bresu\_0506$ ),  $\Delta legI$  ( $\Delta Bresu\_0507$ ),  $\Delta flmG$  ( $\Delta Bresu\_2406$ ) and  $\Delta legI \Delta flmG$ . Box plots represent  
788 the distribution of the flagellum lengths and the cross indicates the average length. Twenty-five  
789 flagella were measured in each case from TEM images.

790

791 **Figure 4.** Heterologous complementation of the *B.subvibrioides*  $\Delta legI$  mutant with (putative) Psel or  
792 LegI orthologs.

793 (A) Motility assays of *B.s.*  $\Delta legI$  cells complemented with LegI-type (yellow) or Psel-type (red)  
794 synthases expressed from P<sub>lac</sub> on pSRK-Gm.

795 (B) Immunoblots probed with antibodies to FljK<sup>Cc</sup>, revealing the intracellular levels of flagellin in *B.s.*  
796  $\Delta legI$  derivatives shown in (A). The blue lines represent the migration of the molecular size standards  
797 (in kDa). BI: *Brevundimonas lutea*, Bv: *Brevundimonas viscosa*, Dv: *Dermabacter vaginalis*, Li:  
798 *Leptospira interrogans*, Tp: *Treponema pallidum*, Td: *Treponema denticola*, Ab<sup>ACICU</sup>: *Acinetobacter*  
799 *baumannii* ACICU, Ab<sup>LUH</sup>: *Acinetobacter baumannii* LUH, Ab<sup>LAC</sup>: *Acinetobacter baumannii* LAC-4, Lp:  
800 *Legionella pneumophila*, Pa<sup>Y82</sup>: *Pseudomonas aeruginosa* Y82, Pa<sup>PAPS475</sup>: *Pseudomonas aeruginosa*  
801 PAPS475, Sj: *Shewanella japonicum*, Basu: *Bacillus subtilis*, Ks: *Kurthia sibirica*, Cb: *Clostridium*  
802 *botulinum*, Gk: *Geobacillus kaustophilus*, Mh: *Moorella humiferrea*, Myco: *Mycobacterium sp.*  
803 *KS0706*, HrrPV6: *Halorubrum sp. PV6*, Ms: *Methanobrevibacter smithii*. All the genes come from  
804 synthetic fragments codon optimized for *E. coli* (except the synthase CDS from Gk that is codon  
805 optimized for *C.c.*). Empty carets indicate the position of modified (glycosylated) flagellin, whereas  
806 filled carets mark unmodified flagellin. Yellow boxes indicate LegI functional orthologs.

807

808 **Figure 5.** Predicted Leg biosynthetic pathway in *B. subvibrioides*.



809 (A) Schematic of the legionaminic acid biosynthetic pathway as it has been described in *C. jejuni* and  
810 elucidated in this study. The pathway requires the addition of GDP into  $\alpha$ -D-glucosamine-1-phosphate  
811 (GlcN-1P) by Bresu\_3267. Then, the different steps are catalyzed by Bresu\_3266, Bresu\_0765,  
812 Bresu\_0506, Bresu\_3264, Bresu\_0507 and Bresu\_3265 to ultimately produced CMP-legionaminic  
813 acid. The activated legionaminic acid is then transferred to the flagellins by the glycosyltransferase  
814 FlmG.

815 (B) Anti-FliJ<sup>Cc</sup> immunoblot analyses of whole cell lysates from *C. crescentus* mutant cultures  
816 expressing *fliJ*<sup>Bs<sub>syn</sub></sup> (codon optimized for *E. coli*) and *flmG*<sup>Bs</sup> from the replicative pMT463 plasmid, in  
817 the presence or absence of a compatible integrative plasmid carrying a *leg*<sup>Bs</sup> synthetic operon  
818 (pXGFP4-*leg*<sup>Bs</sup>) and in the presence or absence of an additional compatible replicative plasmid  
819 carrying *Bresu\_3267* (pMT375). In the presence of pXGFP4-*leg*<sup>Bs</sup> (integrated at the *xyiX* locus) and  
820 pMT375-*Bresu\_3267*, FliJ<sup>Bs<sub>syn</sub></sup> migration is shifted toward higher molecular mass, indicative of  
821 glycosylation. Note that in the *C.c.*  $\Delta$ *fliJ*<sup>x6</sup> background, the six flagellin-encoding genes have been  
822 deleted and the protein detected by the antibodies only corresponds to FliJ<sup>Bs<sub>syn</sub></sup>. The *leg*<sup>Bs</sup> synthetic  
823 operon is composed of *Bresu\_3266*, *Bresu\_0765*, *Bresu\_0506*, *Bresu\_3264*, *Bresu\_0507* (*legI*) and  
824 *Bresu\_3265*. Molecular masses are indicated in kDa by the blue lines. Empty carets indicate the  
825 position of modified (glycosylated) flagellin, whereas filled carets mark unmodified flagellin. Asterisk  
826 indicates a modification of flagellin by FlmG<sup>Bs</sup> that does not require Pse or Leg. (C) Anti-FliJ<sup>Cc</sup>  
827 immunoblot analyses of whole cell lysates from *C. crescentus* mutant cultures expressing FlmG<sup>Cc</sup>,  
828 FlmG<sup>Bs</sup> and FlmG<sup>Cc-Bs<sub>chim</sub></sup> chimera from the replicative pSRK-Gm plasmid (*P<sub>lac</sub>*) in the presence of a  
829 compatible integrative plasmid carrying a *leg*<sup>Bs</sup> synthetic operon (pXGFP4-*leg*<sup>Bs</sup>) and in the presence  
830 or absence of an additional compatible replicative plasmid carrying *Bresu\_3267* (pMT375). Molecular  
831 masses are indicated in kDa by the blue lines. Empty carets indicate the position of modified  
832 (glycosylated) flagellin, whereas filled carets mark unmodified flagellin.

833

834 **Figure 6.** Deletion of *Bresu\_3267* (*legX*) encoding a nucleotidyltransferase affects motility, flagellin  
835 glycosylation and secretion in *B. subvibrioides*.

836 (A) Motility assay of  $\Delta$ *Bresu\_3267* ( $\Delta$ *legX*) *B.s.* cells compared to *WT B.s.* cells harbouring the empty  
837 pSRK-Gm vector (+*P<sub>lac</sub>*) or a complementing derivative with either *Bresu\_3267*, *Bresu\_3266-67* or  
838 *Moorella humiferrea* MOHU\_20790.

839 (B) Immunoblots probed with anti-FliJ<sup>Cc</sup> antibodies from cell lysates (cells) and supernatants (SN) of  
840 *WT B.s.* and  $\Delta$ *Bresu\_3267* ( $\Delta$ *legX*) cultures harbouring either the empty pSRK-Gm vector (+*P<sub>lac</sub>*) or a  
841 complementing plasmid expressing either *Bresu\_3267* (*LegX*), *Bresu\_3266-67* (*LegB-LegX*) or the  
842 *LegX* ortholog *M. humiferrea* MOHU\_20790. Molecular size standards are indicated by the blue lines  
843 with the corresponding value in kDa. Empty carets indicate the position of modified (glycosylated)  
844 flagellin, whereas filled carets mark unmodified flagellin.

845 (C) Images of  $\Delta$ *Bresu\_3267* ( $\Delta$ *legX*) *B.s.* cells analyzed by TEM.

846 (D) Alphafold2 prediction of *Bresu\_3267* (*LegX*) from *Brevundimonas subvibrioides* and Cj1329  
847 (PtmE) from *Campylobacter jejuni*. The common modular architecture reveals an N-terminal part

848 containing two tandem repeats of the cystathionine beta-synthase domain superfamily (cyan) and the  
849 C-terminal part composed of the nucleotidyltransferase domain (red).

850

851 **Figure 7.** Role of Bresu\_3266 (LegB) epimerase/dehydratase and Bresu\_0506 (LegH) sialic O-  
852 acetyltransferase in flagellar motility of *B. subvibrioides* cells.

853 (A) Motility assays of *WT B.s.* and  $\Delta$ *Bresu\_3266* ( $\Delta$ *legB*) cells expressing Bresu\_3266 (LegB),  
854 Bresu\_3267 (LegX) or Bresu\_3266-Bresu\_3267 (LegB-LegX, Bresu\_3266-67) from  $P_{lac}$  on plasmid  
855 pSRK-Gm.

856 (B) Immunoblots probed with anti-FliJ<sup>Cc</sup> antibodies to reveal flagellins in cell extracts (cells) and  
857 supernatants (SN) of the strains described in (A). Empty carets indicate the position of modified  
858 (glycosylated) flagellin, whereas filled carets mark unmodified flagellin.

859 (C) TEM images of  $\Delta$ *Bresu\_3266* ( $\Delta$ *legB*) cells expressing *Bresu\_3267* from  $P_{lac}$  on pSRK-Gm.

860 (D) Motility assay of *WT B.s.* and  $\Delta$ *Bresu\_0506* ( $\Delta$ *legH*) cells complemented with a plasmid  
861 expressing Bresu\_0506 (LegH) from  $P_{lac}$  on pSRK-Gm.

862 (E) Immunoblots probed with anti-FliJ<sup>Cc</sup> antibodies to reveal flagellins in cell extracts (cells) and  
863 supernatants (SN) of the strains described in (D).

864 (F) TEM images of  $\Delta$ *Bresu\_0506* ( $\Delta$ *legH*) cells.

865

866 **Figure S1.** Complementation of *C. crescentus*  $\Delta$ *pseI* cells and *B. subvibrioides*  $\Delta$ *legI* cells with  
867 plasmids expressing Psel-like synthase (sequence) orthologs.

868 (A) Immunoblots probed with anti-FliJ<sup>Cc</sup> antibodies from extracts of *C.c.*  $\Delta$ *pseI* cells expressing the  
869 orthologs from the vanillate-inducible  $P_{van}$  promoter on plasmid pMT335 (+ $P_{van}$ ). Molecular masses  
870 are indicated by the blue lines in kDa. Empty carets indicate the position of modified (glycosylated)  
871 flagellin, whereas filled carets mark unmodified flagellin.

872 (B) Motility assay of the strains described in (A).

873 (C) Immunoblot performed on *B.s.*  $\Delta$ *legI* cells harboring CDSs (*pseI<sup>Cc</sup>*, *pseI<sup>So</sup>*, *pseI<sup>Ku</sup>*, *pseI<sup>Cj</sup>*) for Psel-  
874 like proteins, LegI-like proteins (*legI<sup>Bs</sup>*, *legI<sup>Cj</sup>*) or a NeuB-like synthase (*neuB<sup>Cj</sup>*) under  $P_{van}$  control. Blue  
875 lines indicate the molecular masses in kDa. Empty carets indicate the position of modified  
876 (glycosylated) flagellin, whereas filled carets mark unmodified flagellin. (D) Motility assay of the strains  
877 described in (C).

878

879 **Figure S2.** Pseudaminic acid is detected in *C. crescentus* purified flagella. (A) Chromatograms of RP-  
880 HPLC-FL experiments performed on purified flagella from *C. crescentus* WT cells. The potential  
881 nonulosonic acids (NulOs) produced by *C. crescentus* and present on the flagellum have been  
882 derivatized by DMB, a fluorogenic reagent that shows high specificity for NulOs and analyzed by  
883 reverse-phase high performance liquid chromatography coupled to fluorescence (RP-HPLC-FL). One  
884 major peak (retention times of 9.8 min) is detected in purified flagellum. This retention time perfectly  
885 overlaps with the first peak observed for pseudaminic acid standard composed of Pse4Ac5Ac7Ac and  
886 Pse5Ac7Ac isolated from the capsule of *A. baumannii* NIPH329 when co-injected. (B)  
887 Chromatograms of RP-HPLC-FL experiments performed on purified flagella from *B. subvibrioides* WT

888 cells. One major peak (retention times of 9.8 min) and one minor peak (15.4 min) are detected in  
889 purified flagellum. These retention times are different to the Leg standard (Leg5Ac7Ac) used and  
890 isolated from the *A. baumannii* LUH5533 capsule. Chromatograms are representative of three  
891 independent experiments.

892

893 **Figure S3.** FlmG orthologs are not interchangeable between *C. crescentus* and *B. subvibrioides*.

894 (A) Immunoblots probed with antibodies to FljK<sup>Cc</sup> antibodies to reveal flagellin in lysates of *C.c.*  $\Delta$ *flmG*  
895 cells expressing *flmG* from *C.c.* and *B.s.* or a gene that codes for a chimeric FlmG composed of the  
896 N-terminal part of FlmG<sup>Cc</sup> (harboring the TPR domain that promotes FlmG-Flagellins interaction) and  
897 the C-terminal part of FlmG<sup>Bs</sup> (carrying the glycosyltransferase domain) from *P<sub>lac</sub>* on plasmid pSRK-  
898 Gm. Empty carets indicate the position of modified (glycosylated) flagellin, whereas filled carets mark  
899 unmodified flagellin.

900 (B) Motility assays of the strains described in Figure 5C: *C. crescentus* mutant expressing FlmG<sup>Cc</sup>,  
901 FlmG<sup>Bs</sup> and FlmG<sup>Cc-Bs<sub>chim</sub></sup> chimera from the replicative pSRK-Gm plasmid (*P<sub>lac</sub>*) in the presence of a  
902 compatible integrative plasmid carrying a *leg<sup>Bs</sup>* synthetic operon (pXGFP4-*leg<sup>Bs</sup>*) and in the presence  
903 or absence of an additional compatible replicative plasmid carrying *Bresu\_3267* (pMT375).

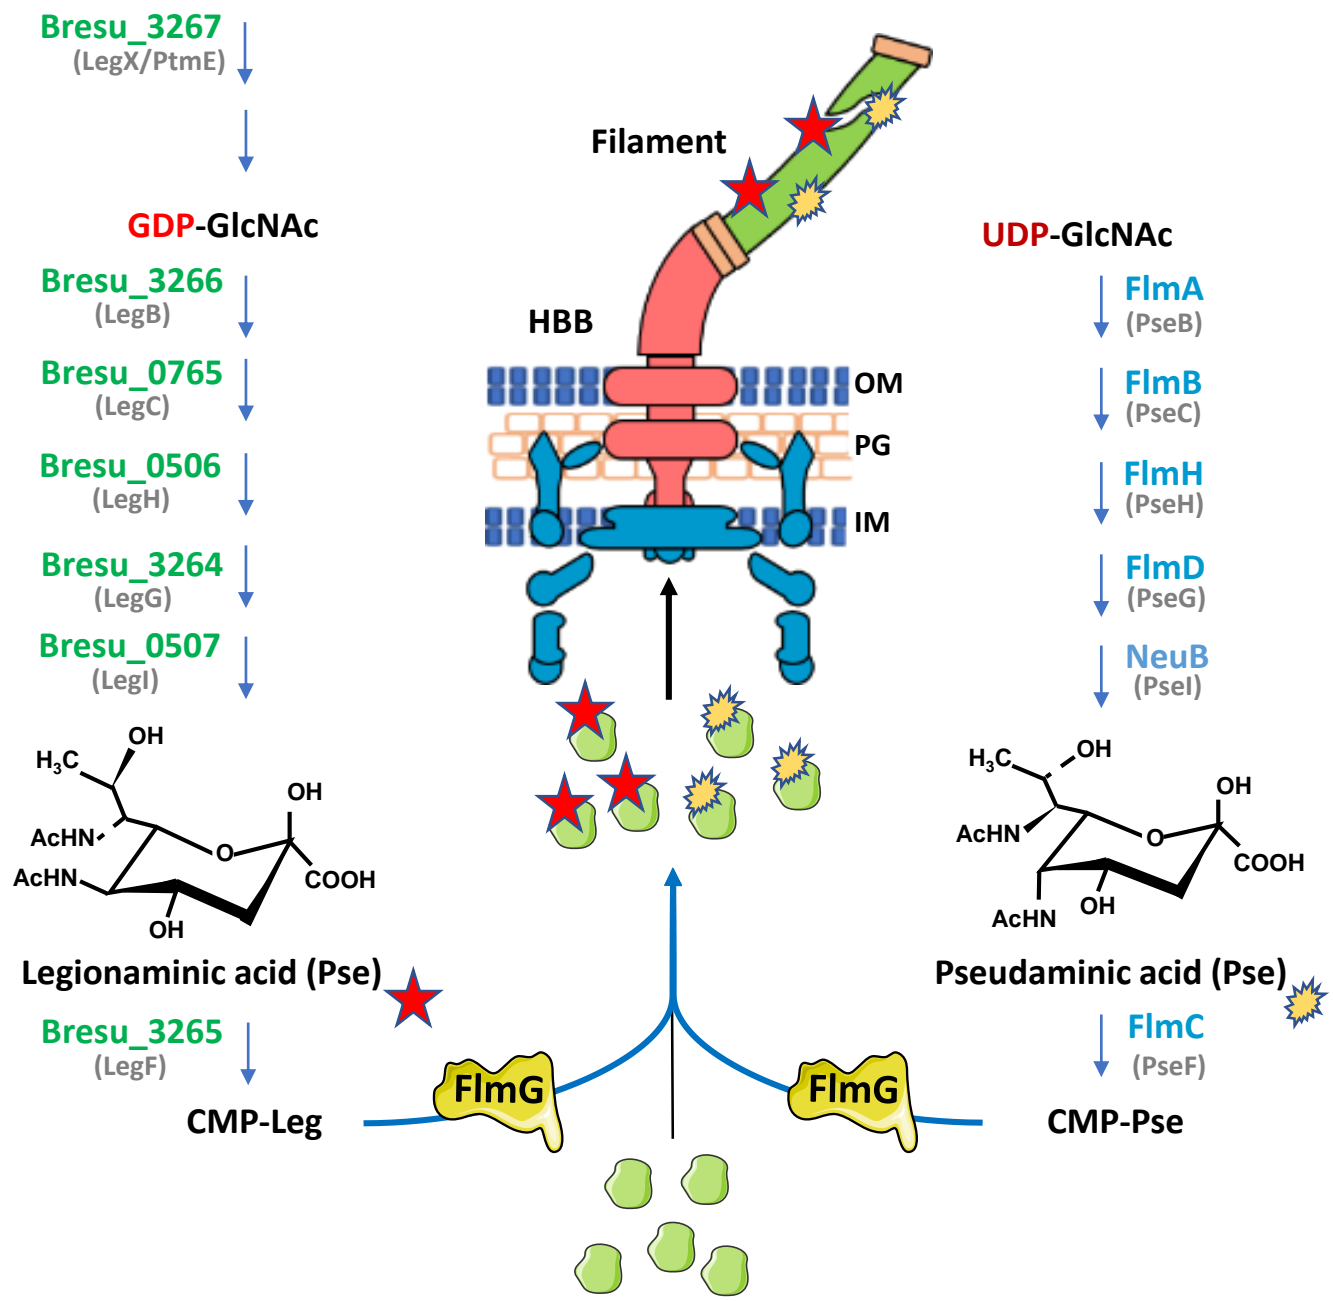

*Brevundimonas subvibrioides*

*Caulobacter crescentus*

**A**

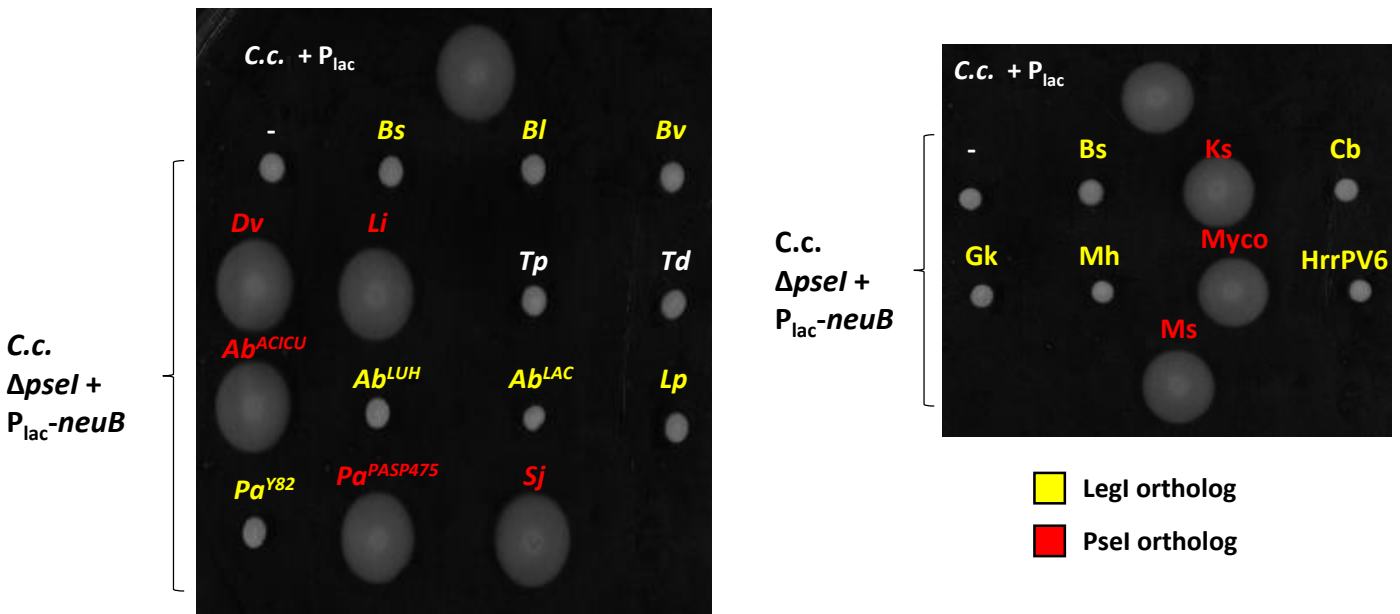

**B**

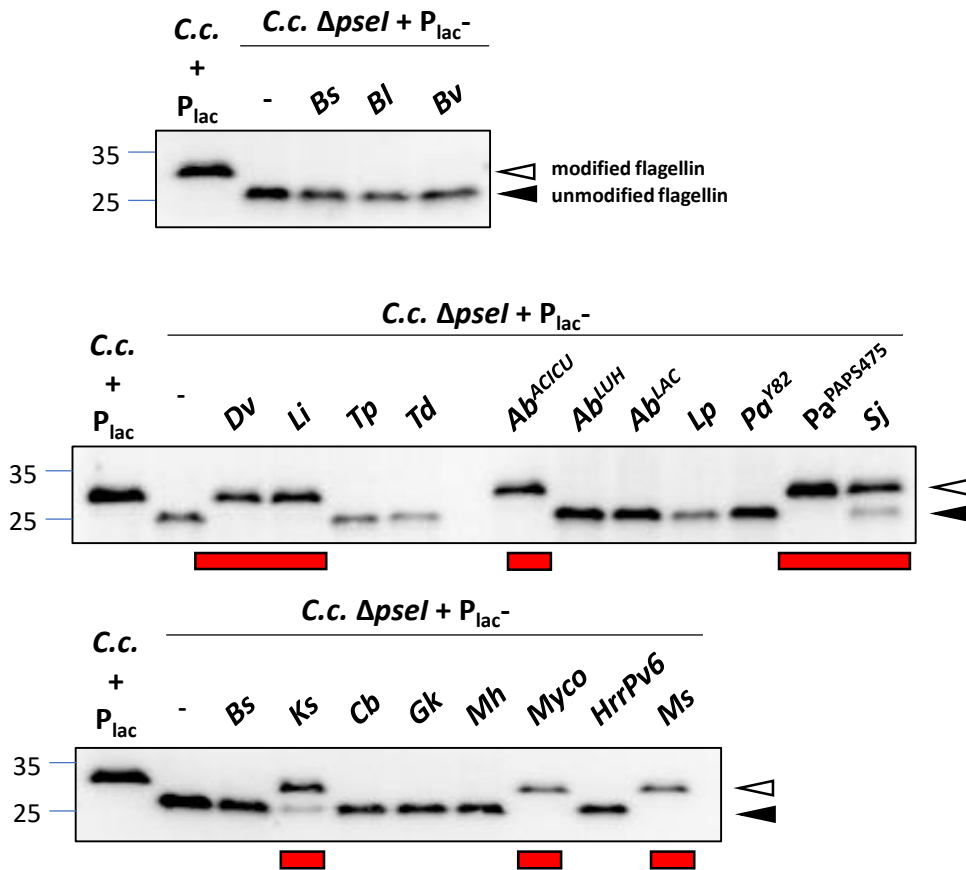

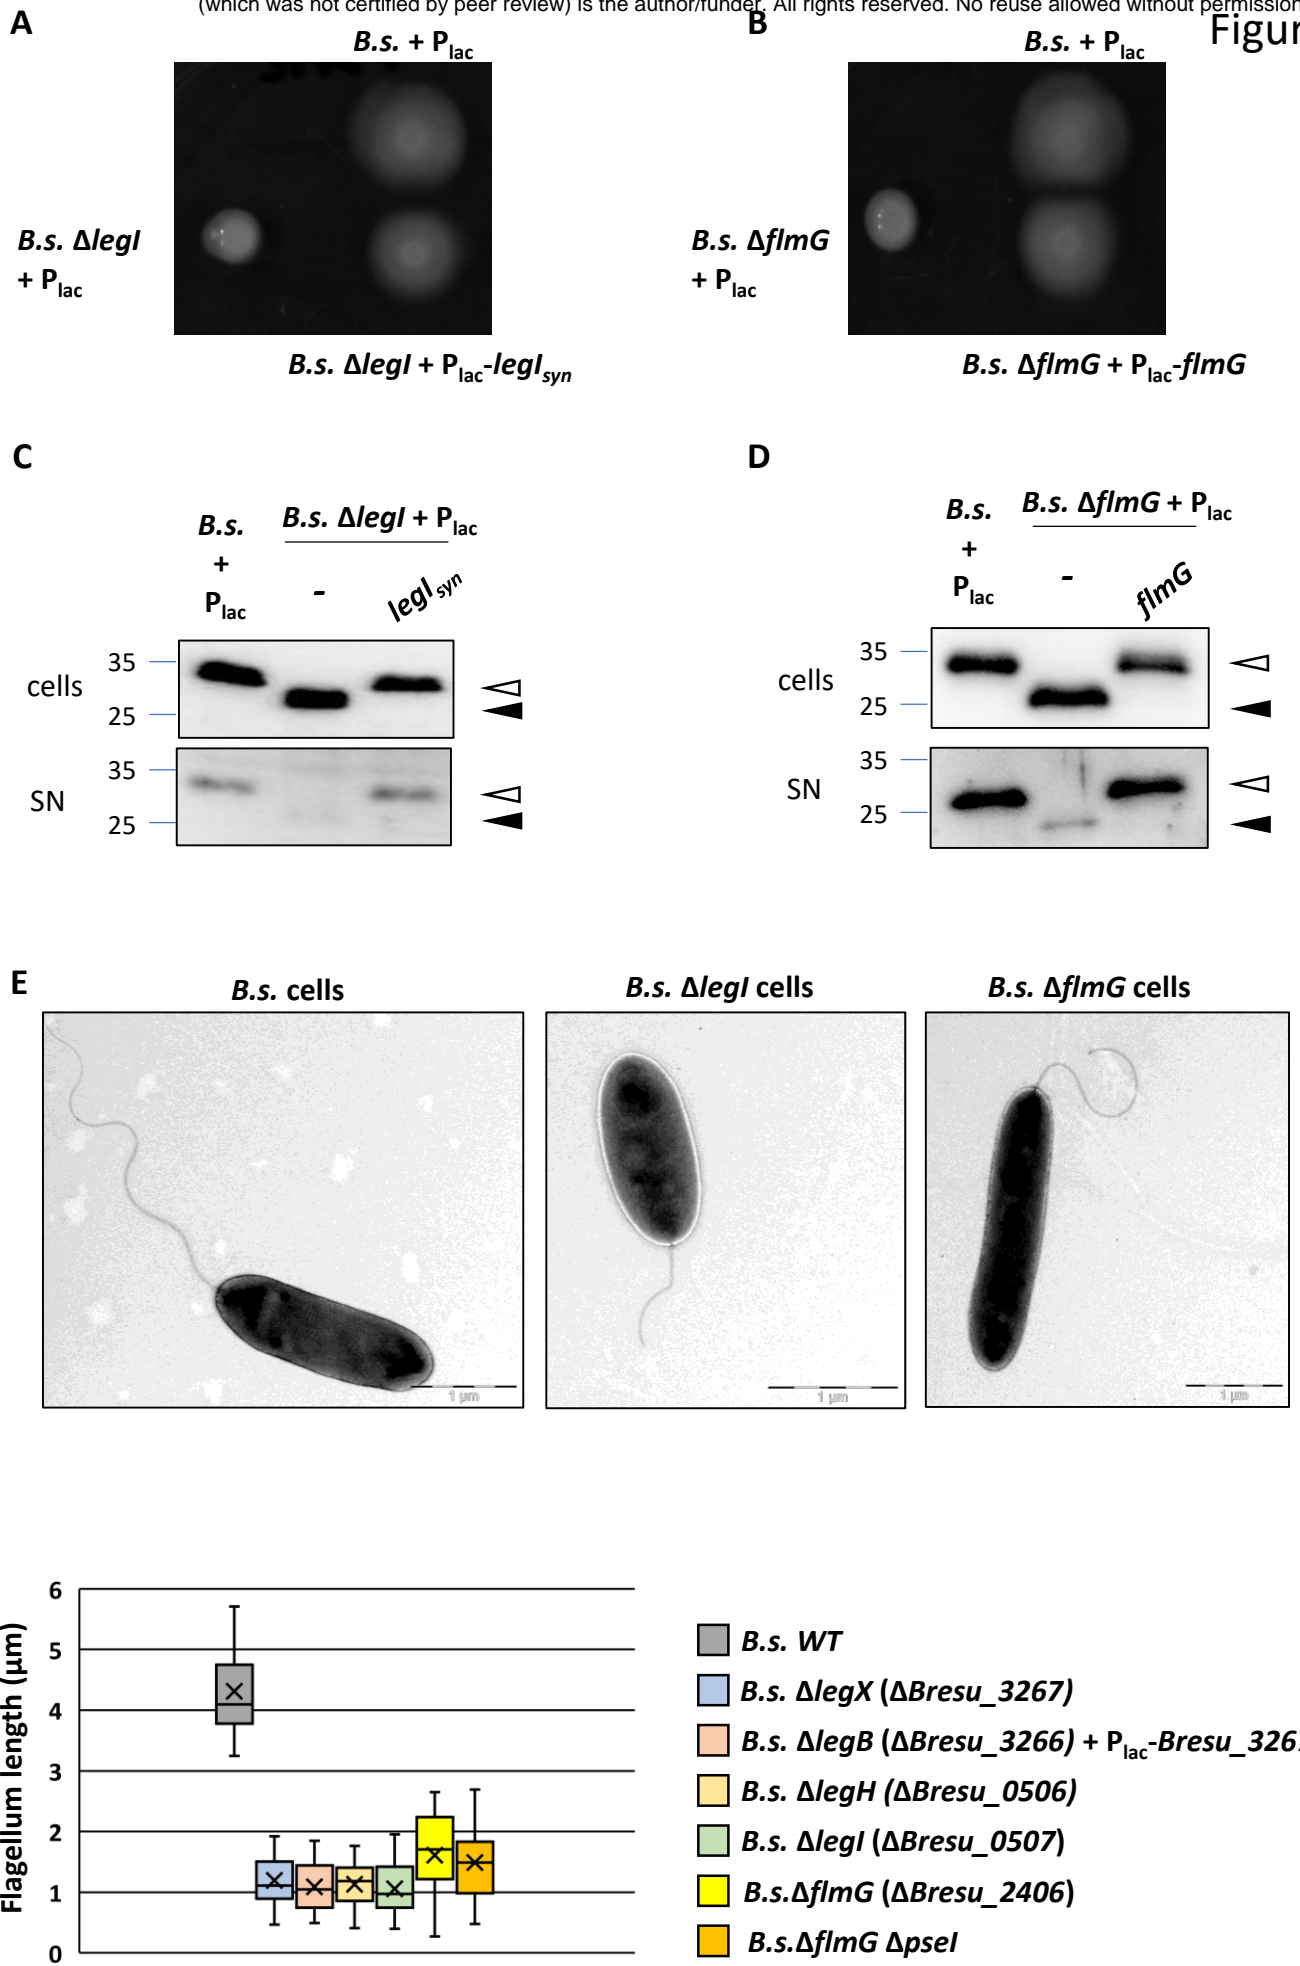



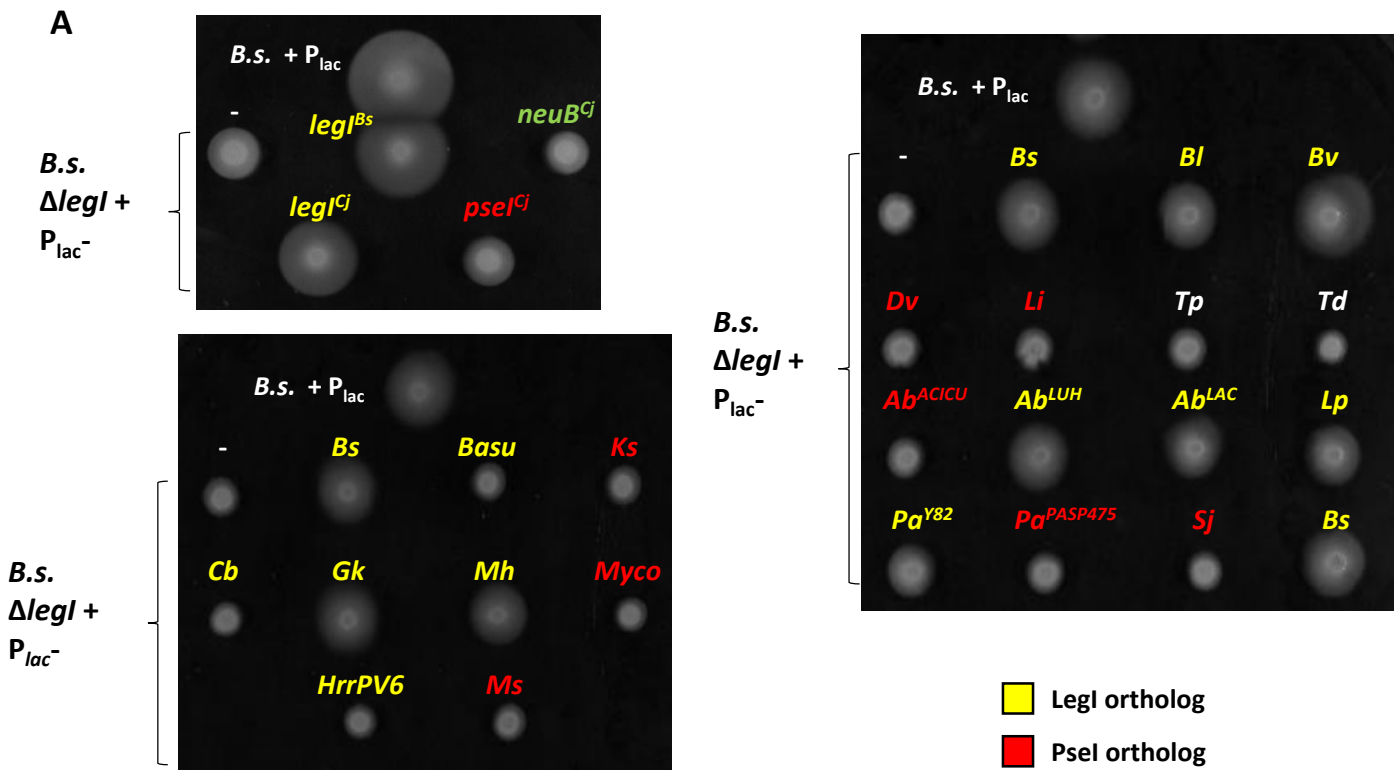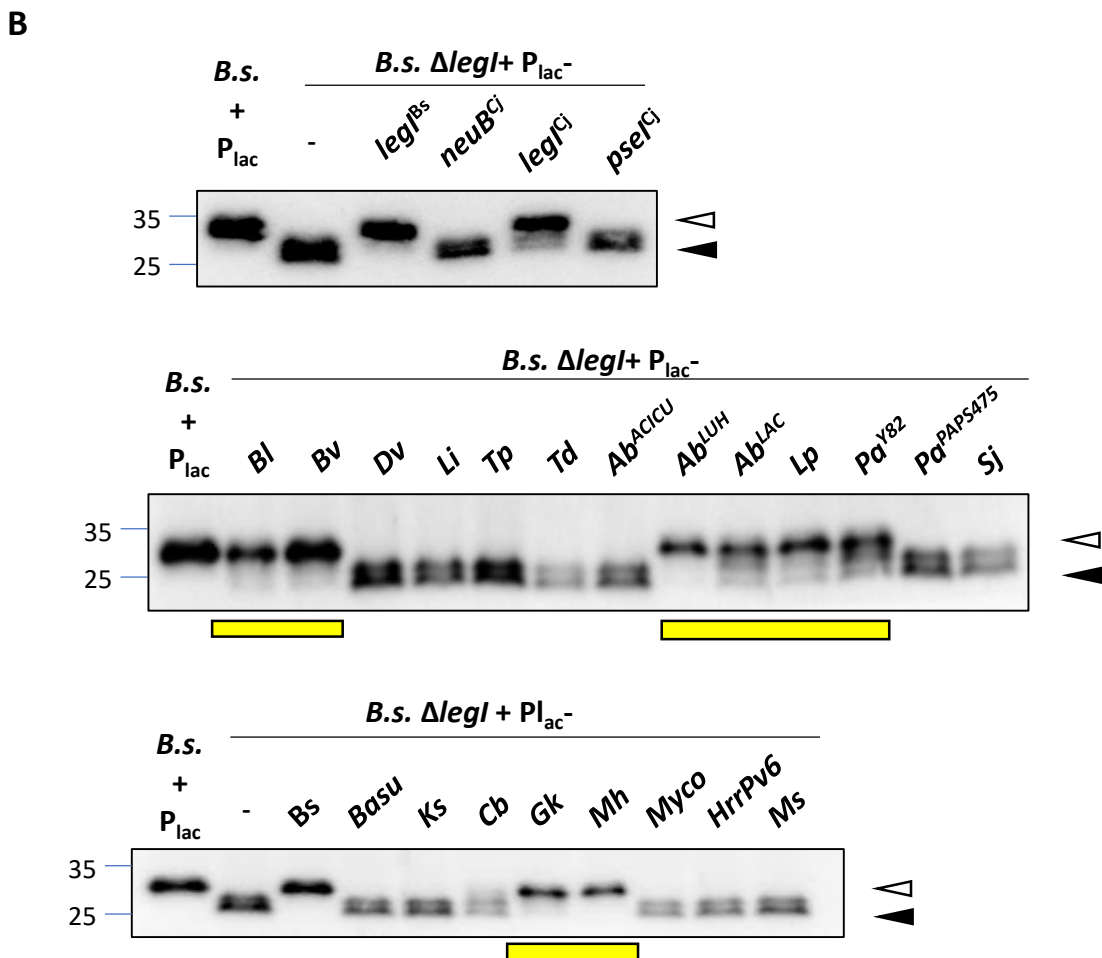

A

Bresu\_3267 (LegX)

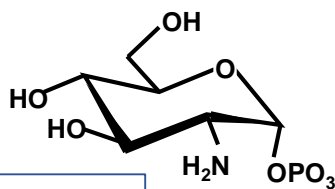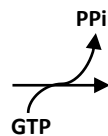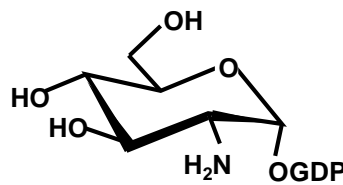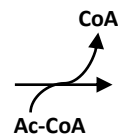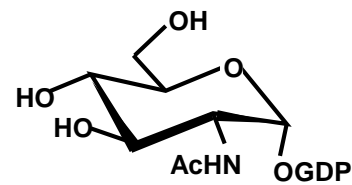

Leg biosynthesis from GDP-GlcNAc → CMP-Leg

Bresu\_3266 (LegB)

Bresu\_0506 (LegH)

Bresu\_0765 (LegC) ?

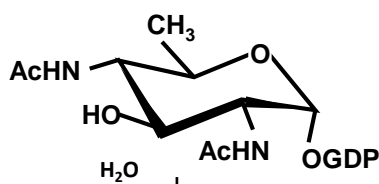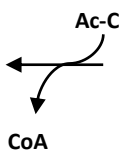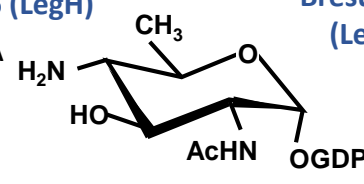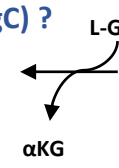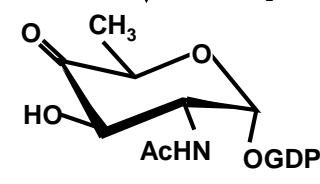

Bresu\_3264 (LegG)

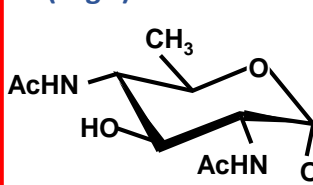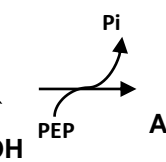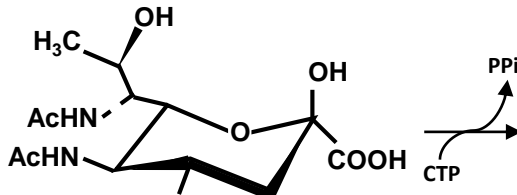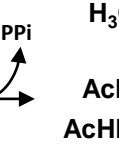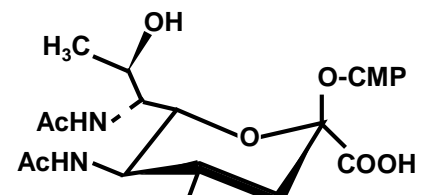

Flagellins

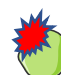

FlmG

B

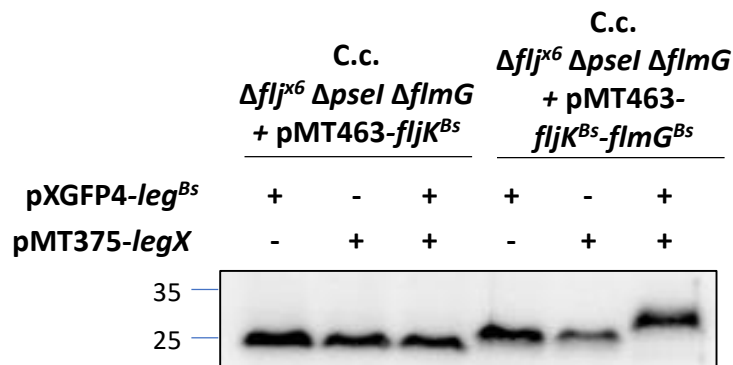

*Leg*<sup>Bs</sup> = Bresu\_3266 – Bresu\_0765 – Bresu\_0506 – Bresu\_3264 – Bresu\_0507 – Bresu\_3265

C

C.c.  $\Delta flmG$  + pXGFP4-*leg*<sup>Bs</sup> + P<sub>lac</sub>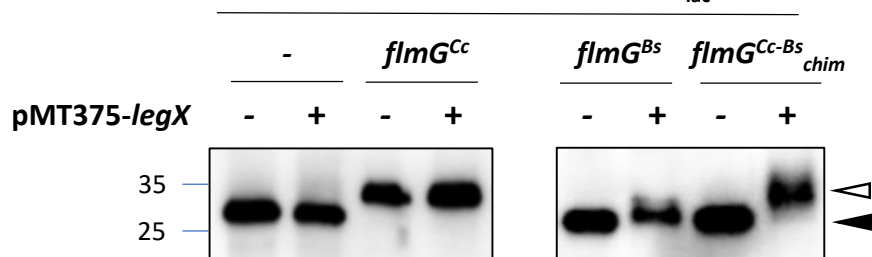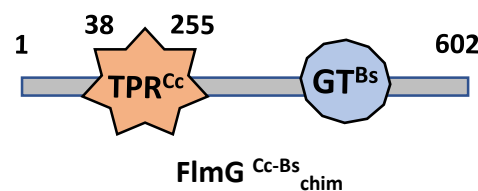

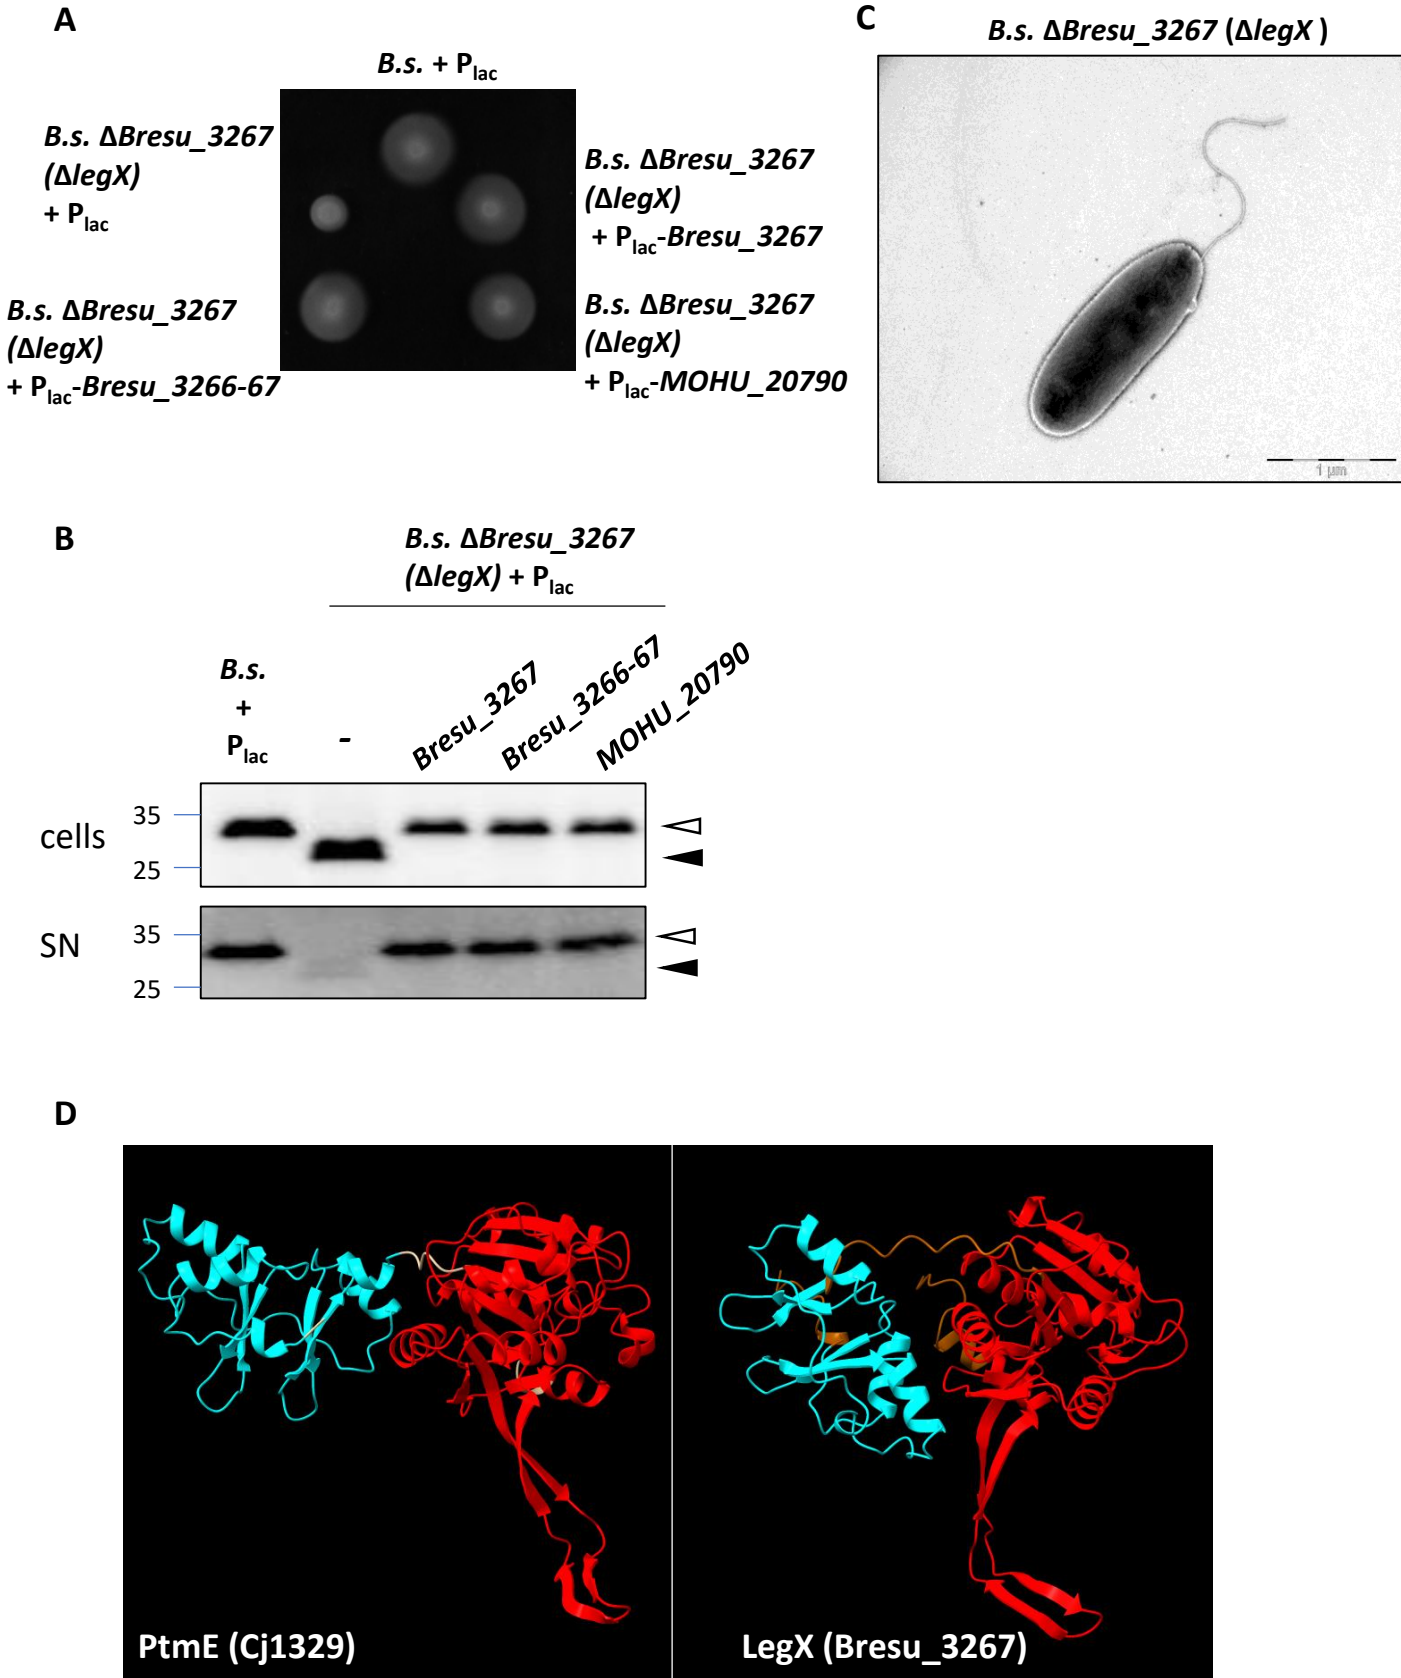

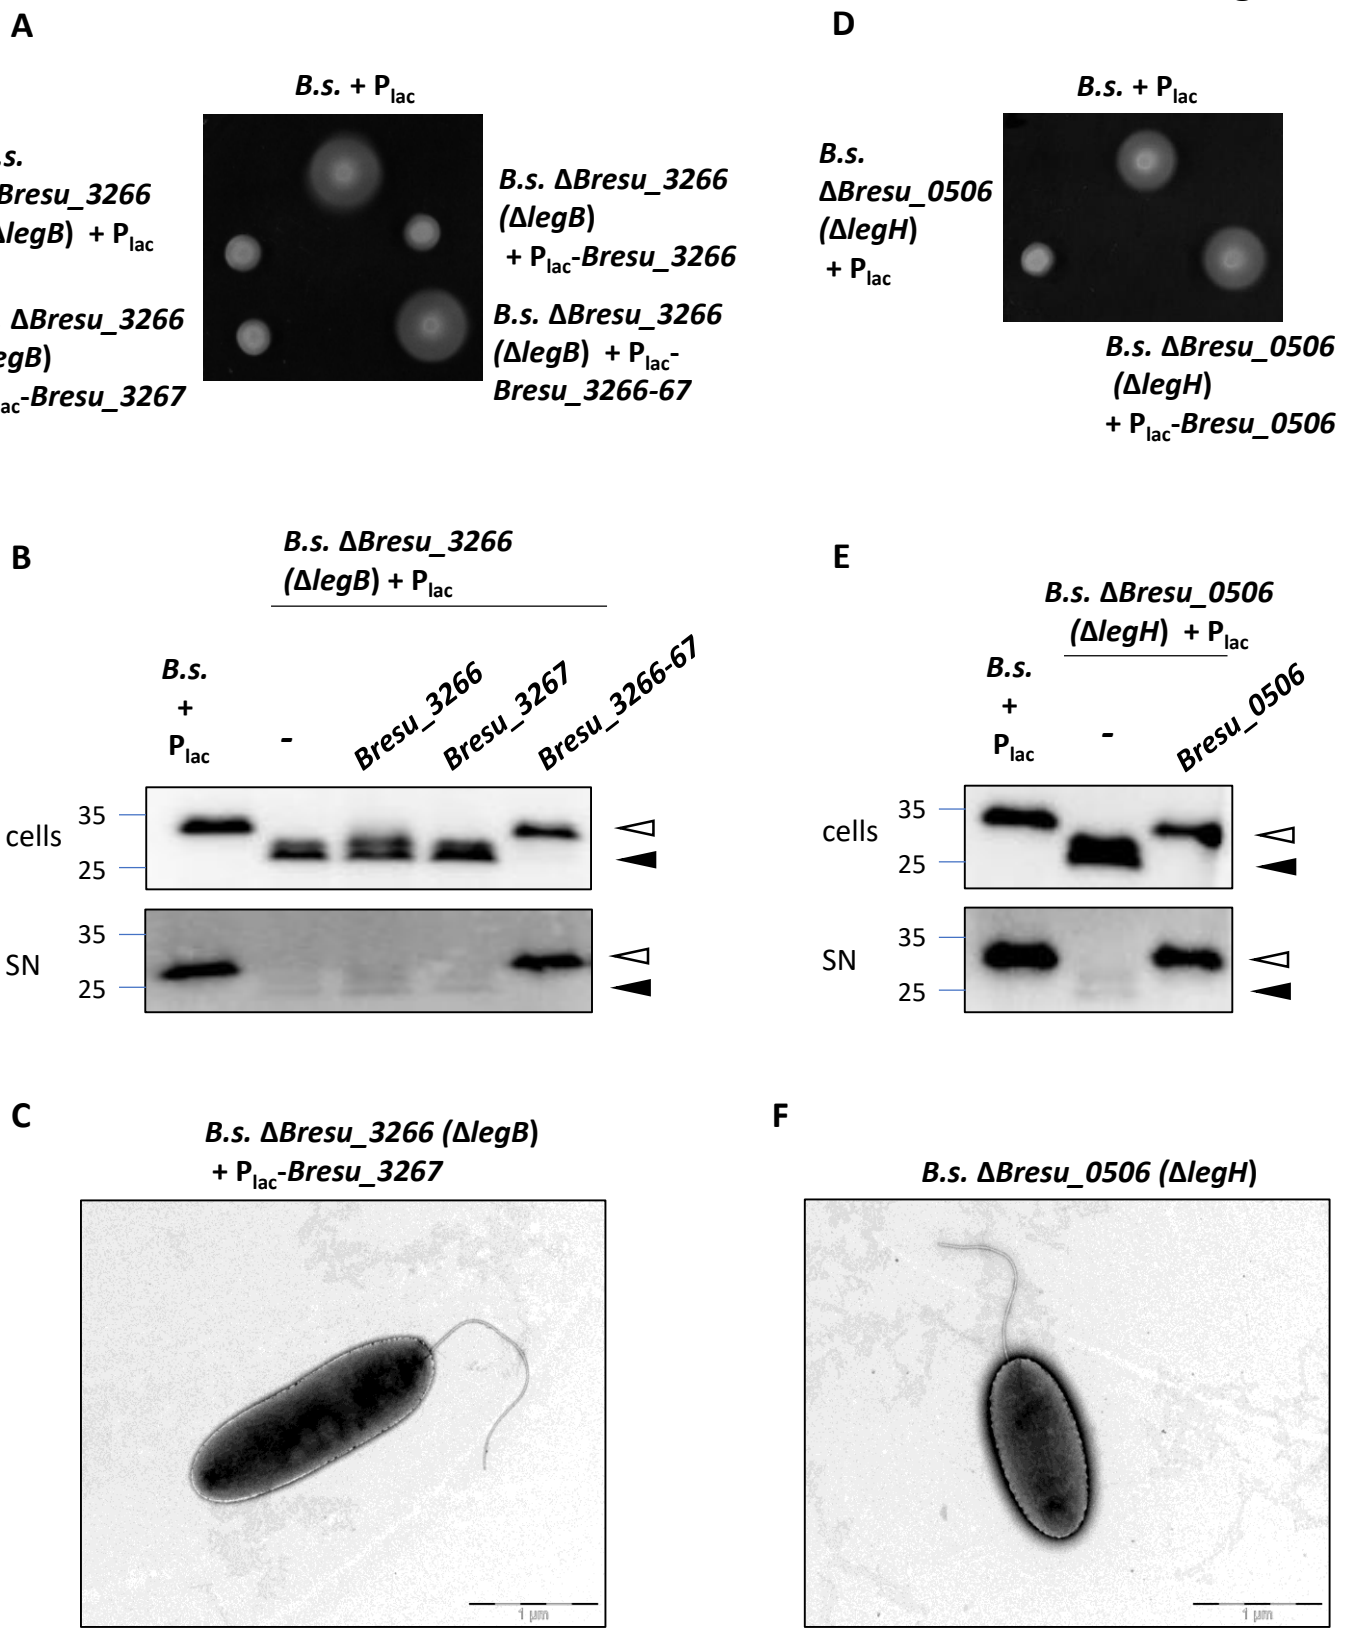

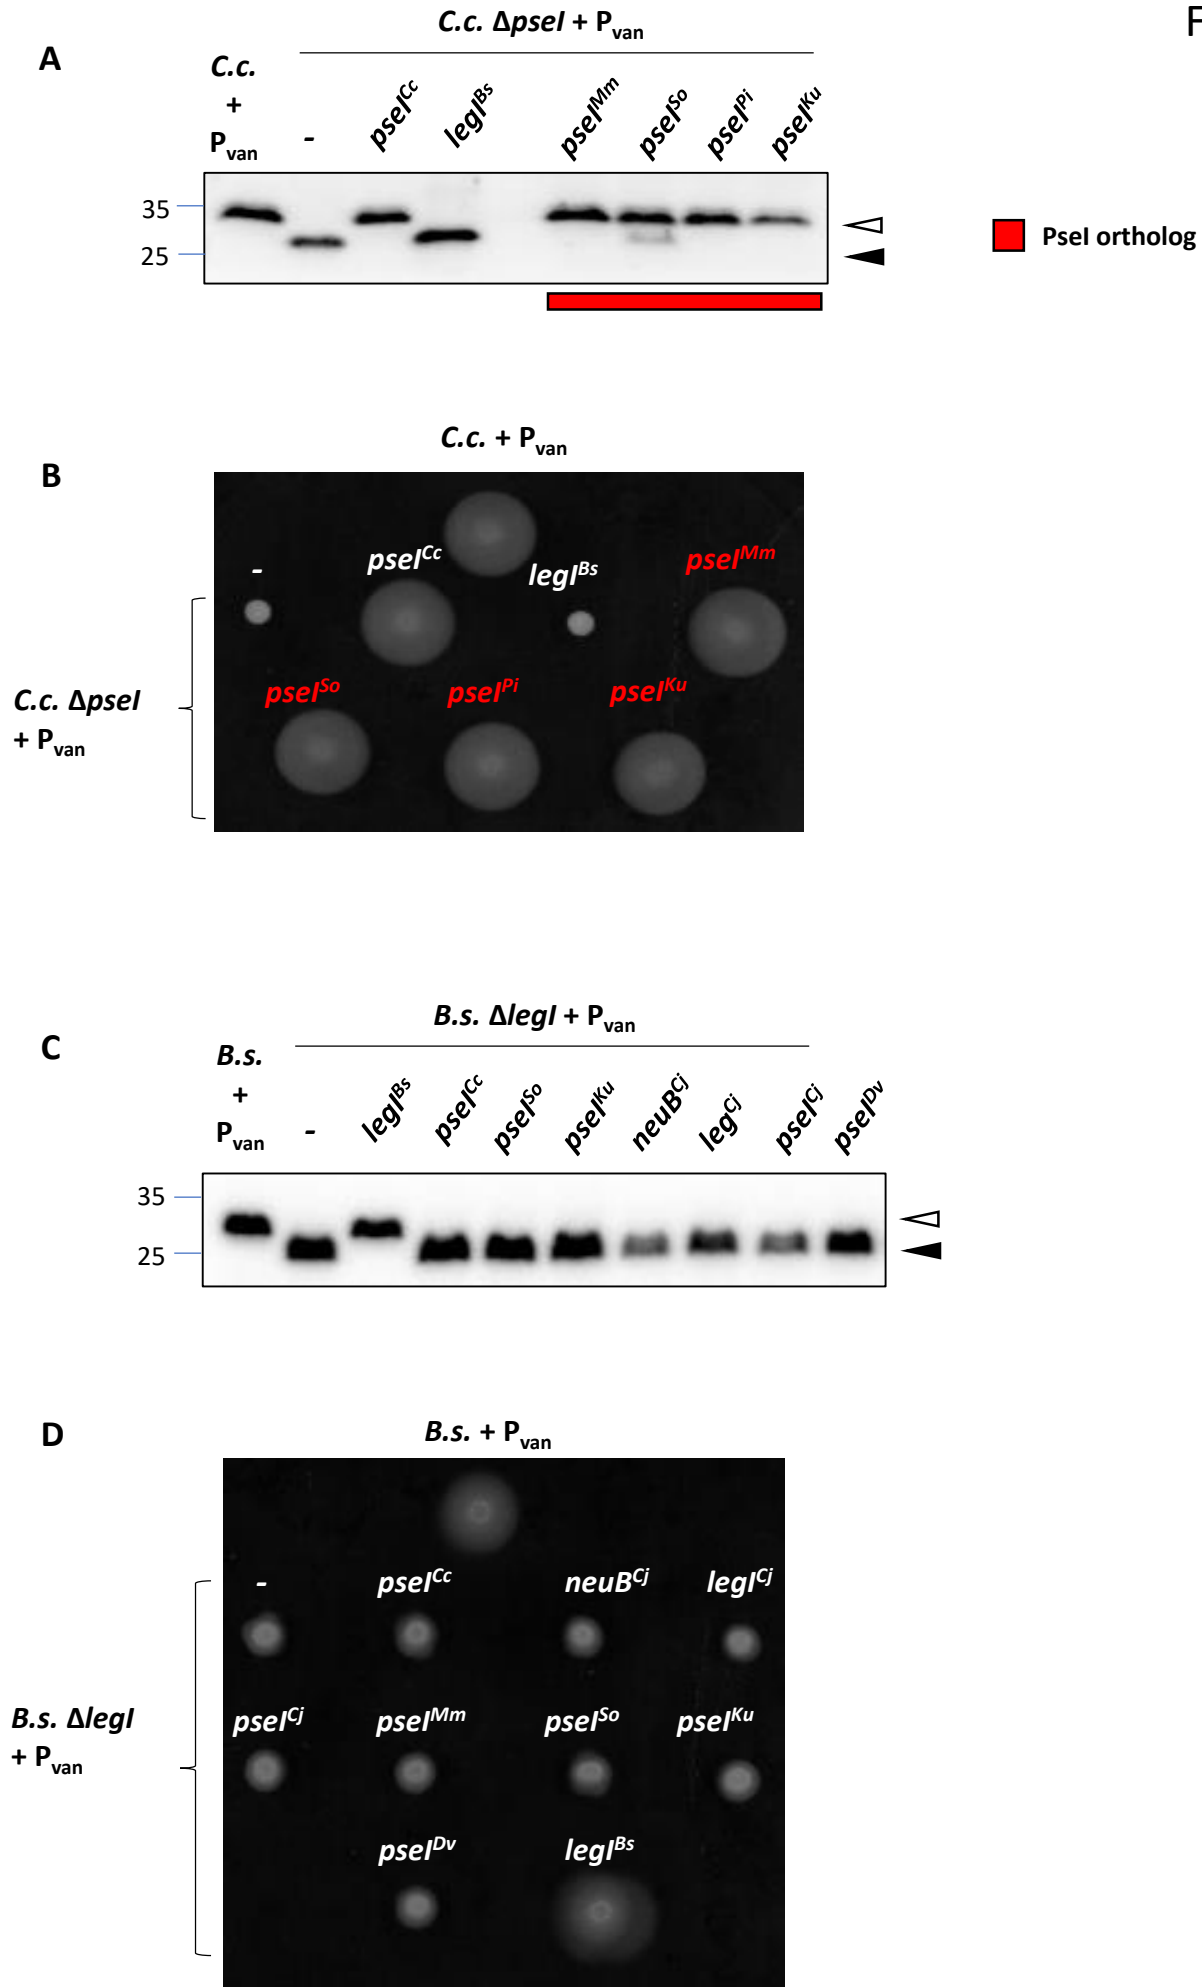

A

**C.c. purified  
flagellum**

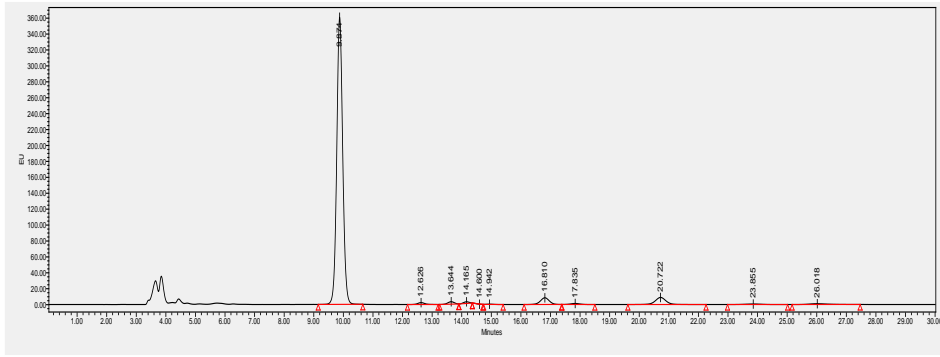

**Pse standard  
(Pse4Ac5Ac7Ac  
+ Pse5Ac7Ac)**

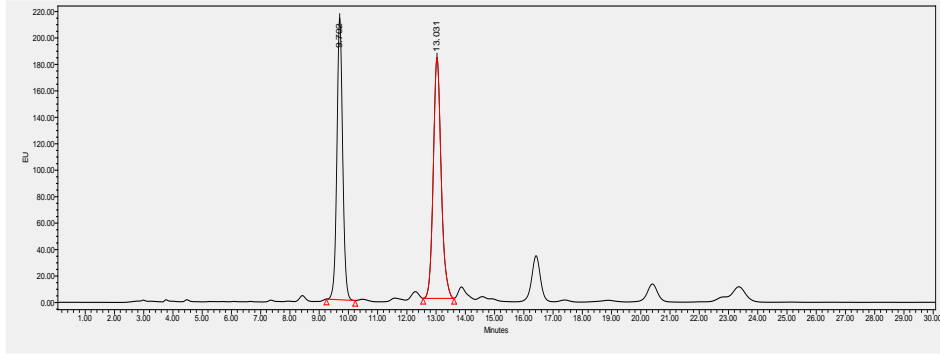

**Co-injection C.c.  
purified  
flagellum + Pse  
standard**

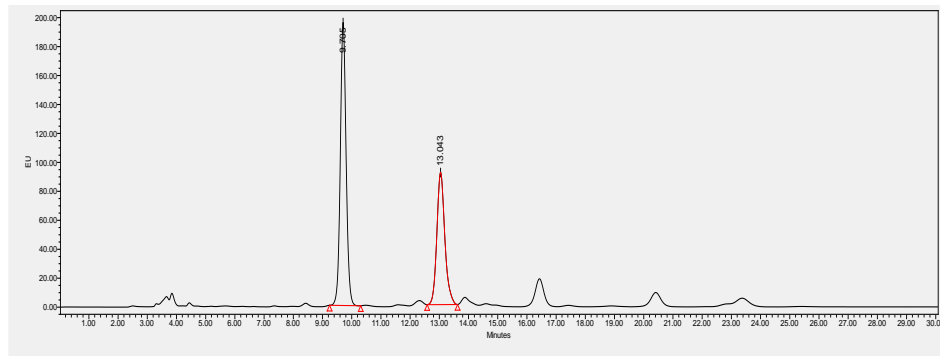

B

**B.s. purified  
flagellum**

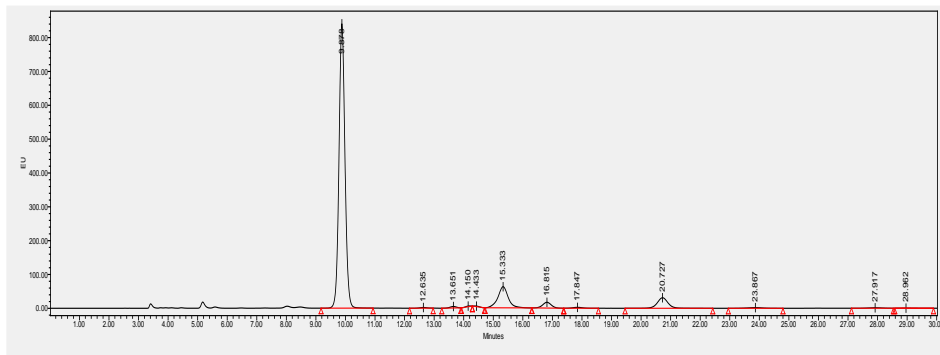

**Leg standard  
(Leg5Ac7Ac)**

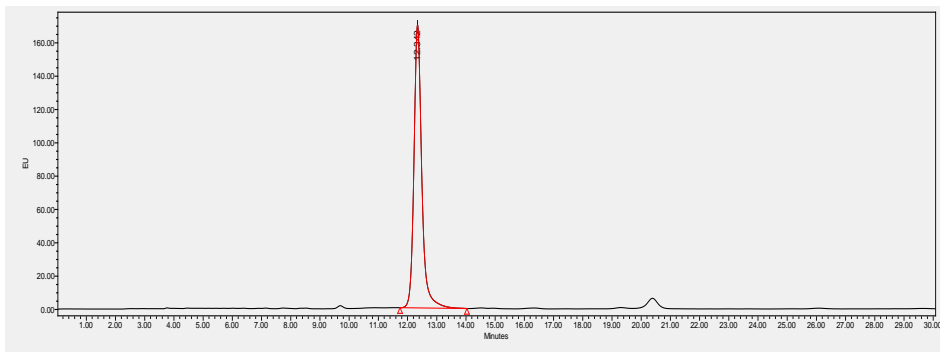



A

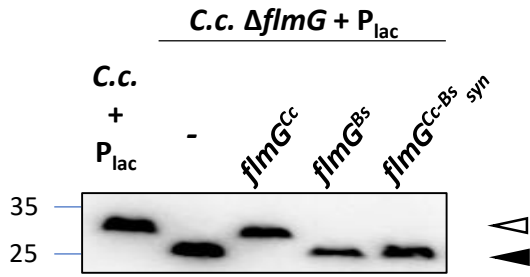

B

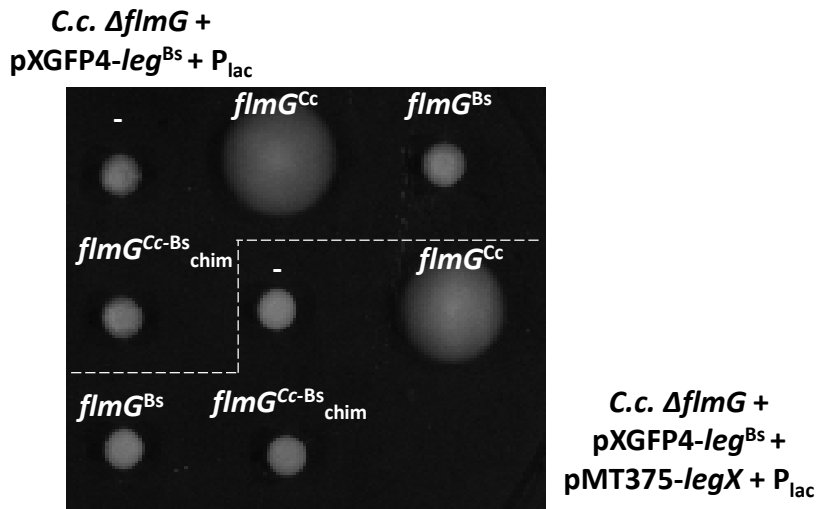

Source: https://www.biorxiv.org/content/10.1101/2022.03.25.485807v1.full.pdf
